# Supplementary material for: A hippocampo-cerebellar centred network for the learning and execution of sequence-based navigation
Source: PubMed Central journal article supplement (PMC5736633; doi:10.1038/s41598-017-18004-7), 2017-12-19
Supplement: 41598_2017_18004_MOESM1_ESM.pdf [file 41598_2017_18004_MOESM1_ESM.pdf]

**A hippocampo-cerebellar centred network for the learning  
and execution of sequence-based navigation**

Benedicte M. Babayan<sup>1</sup>, Aurélie Watilliaux<sup>1</sup>, Guillaume Viejo<sup>2</sup>,  
Anne-Lise Paradis<sup>1</sup>, Benoît Girard<sup>2</sup> and Laure Rondi-Reig<sup>1,\*</sup>

1- Sorbonne Universités, UPMC Univ Paris 06, INSERM, CNRS, Neurosciences  
Paris Seine - Institut de Biologie Paris Seine (NPS - IBPS), Cerebellum Navigation  
and Memory team (CeZaMe), 75005 Paris, France

2- Sorbonne Universités, Université Pierre et Marie Curie (UPMC), CNRS UMR  
7222, Institut des Systèmes Intelligents et de Robotique (ISIR), F-75005, Paris,  
France

**\*Corresponding author:** Laure Rondi-Reig, [laure.rondi-reig@upmc.fr](mailto:laure.rondi-reig@upmc.fr)

IBPS-Neurosciences Paris Seine, Sorbonne Universités, UPMC Univ Paris 06,  
CeZaMe team, 9 Quai Saint Bernard, 5e étage, 75005 Paris, France

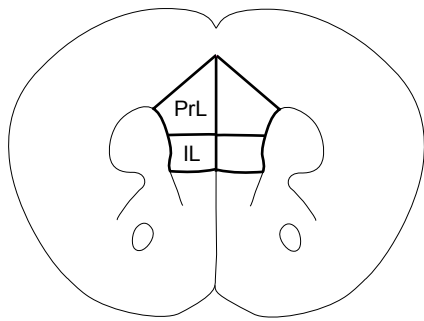

Bregma 1.94 mm

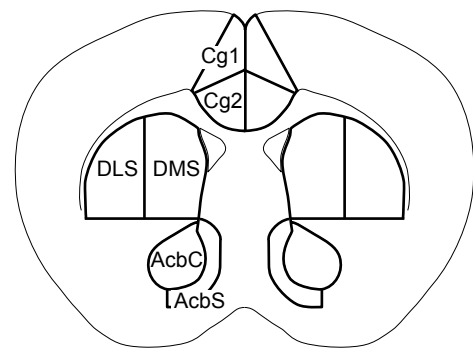

Bregma 0.98 mm

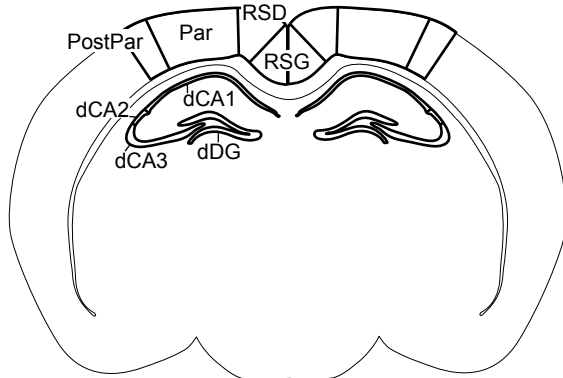

Bregma -1.94 mm

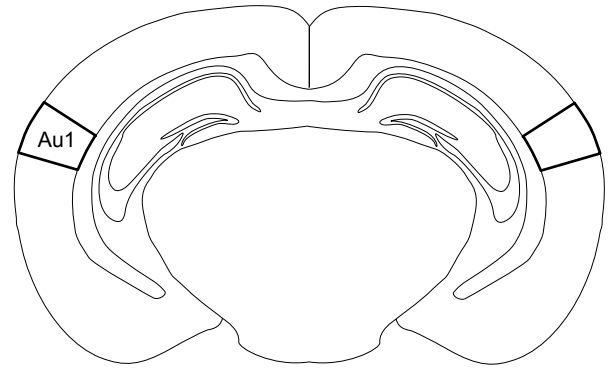

Bregma -2.46 mm

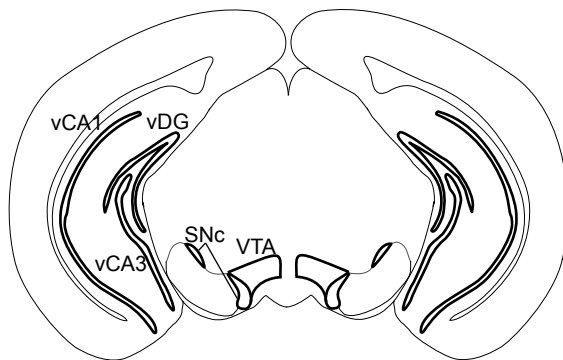

Bregma -3.28 mm

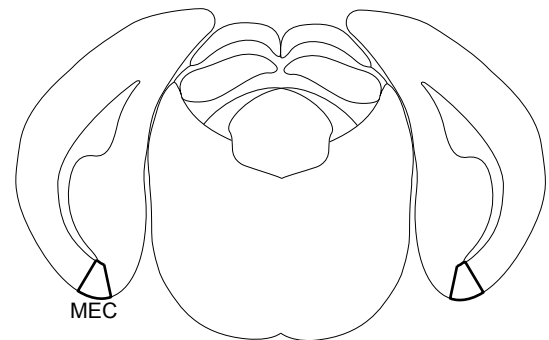

Bregma -4.36 mm

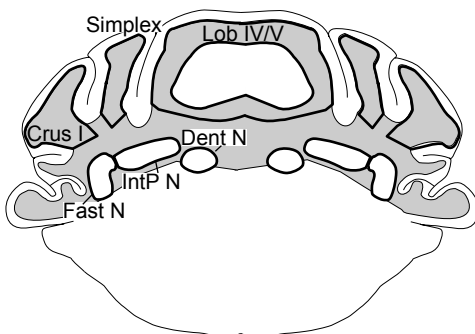

Bregma -6.00 mm

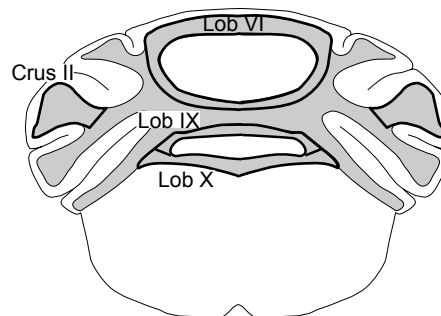

Bregma -6.84 mm

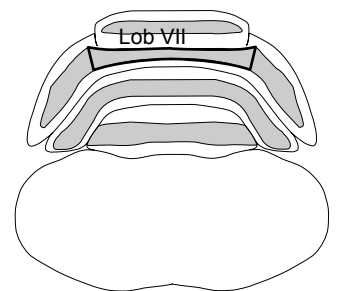

Bregma -7.48 mm

**Supplementary Figure 1: Schematic representation of the structures analyzed for c-Fos expression.**

Abbreviations: cortex: primary auditory (Au1), prelimbic (PrL), infralimbic (IL), cingulate 1 and 2 (Cg1, Cg2), dysgranular and granular retrosplenial (RSD, RSG), parietal and posterior parietal (Par, PostPar), medial entorhinal (MEC); striatum and dopaminergic nuclei (DA nuc): dorsomedial striatum (DMS), dorsolateral striatum (DLS), nucleus accumbens core (AcbC) and shell (AcbS), ventral tegmental area (VTA), substantia nigra pars compacta (SNc); hippocampus: dorsal CA1 (dCA1), dorsal CA2 (dCA2), dorsal CA3 (dCA3), ventral CA1 (vCA1), ventral CA2 (vCA2), ventral CA3 (vCA3), dorsal and ventral dentate gyrus (dDG, vDG); cerebellum: lobules IV/V (Lob IV/V), VI (Lob VI), VII (Lob VII), IX (Lob IX), X (Lob X), dentate (Dent N), fastigial (Fast N) and interpositus nuclei (IntP N).

Exploration

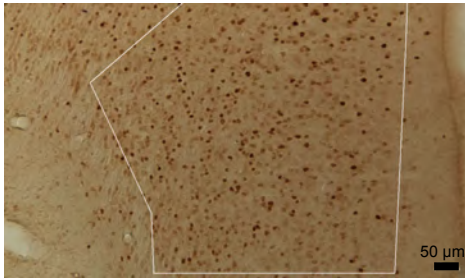

**Prelimbic cortex**

Exploitation

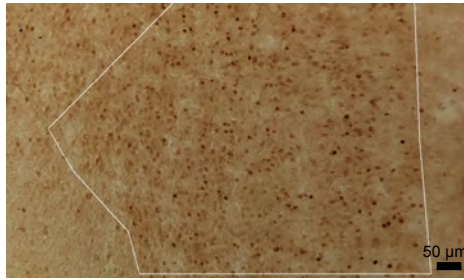

Exploitation swimming control

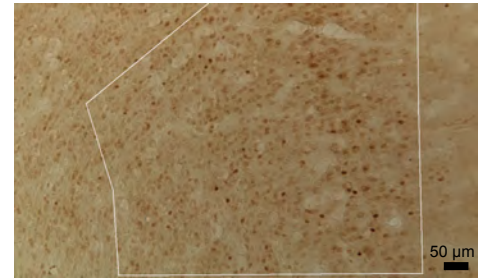

Exploration

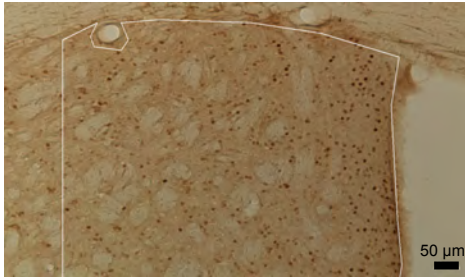

**Dorsomedial striatum**

Exploitation

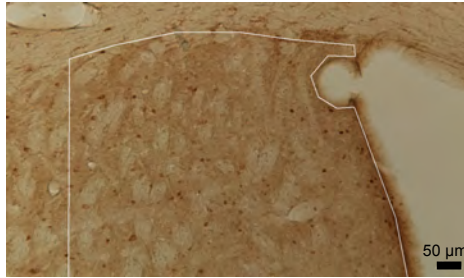

Exploitation swimming control

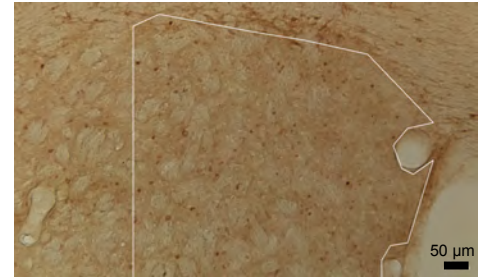

Exploration

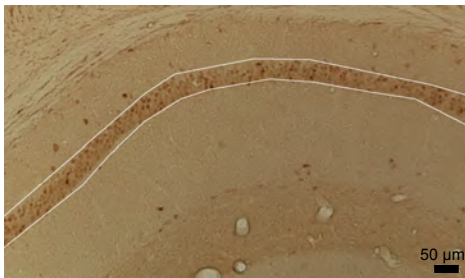

**Dorsal CA1**

Exploitation

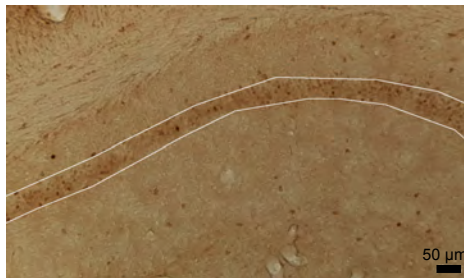

Exploitation swimming control

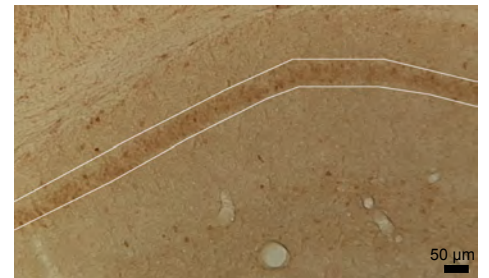

Exploration

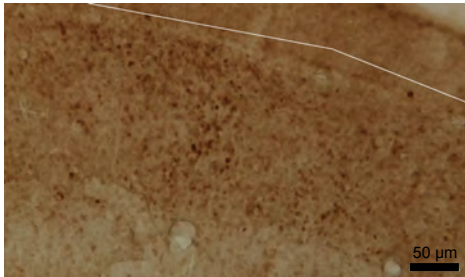

**Lobule IV/V**

Exploitation

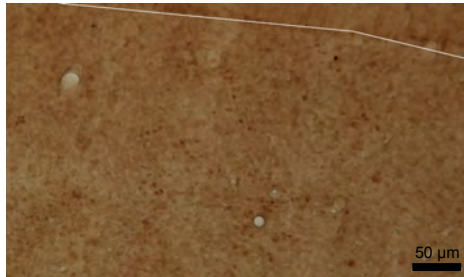

Exploitation swimming control

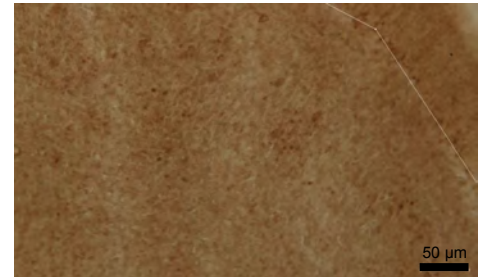

Exploration

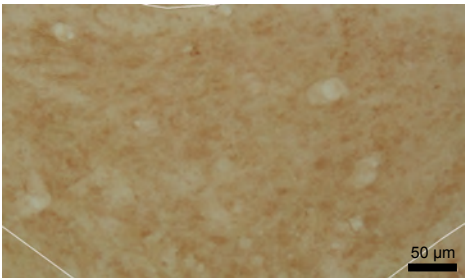

**Fastigial nucleus**

Exploitation

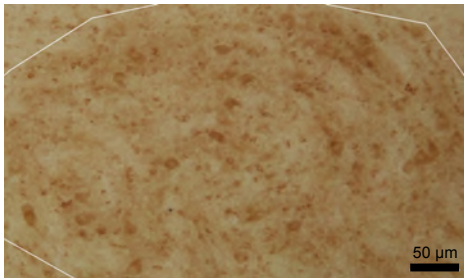

Exploitation swimming control

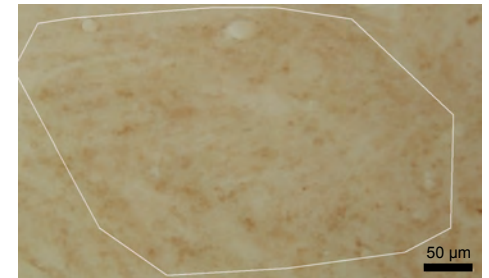

**Supplementary Figure 2: Example c-Fos protein stainings in prelimbic cortex, dorsomedial striatum, dorsal CA1, lobule IV/V and fastigial nucleus.** Stainings from mice belonging to exploration, exploitation and exploitation swimming control groups are shown. White lines correspond to the limits of the region counted, as shown in **Supplementary Figure 1**.

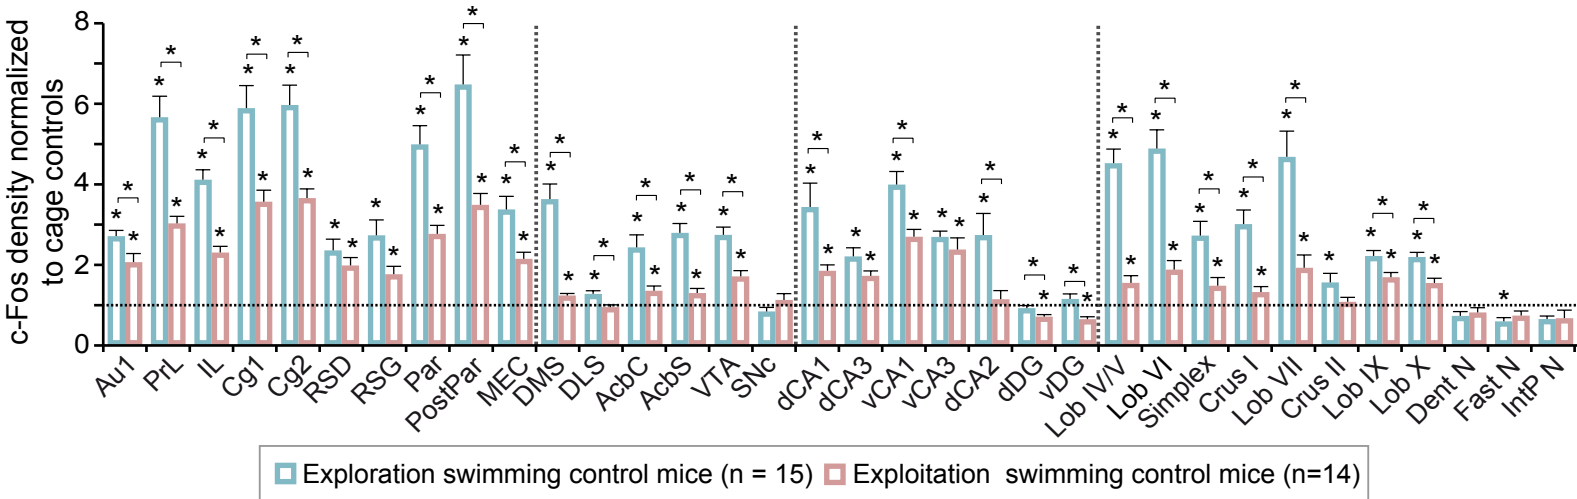

**Supplementary Figure 3: Activation patterns across exploration and exploitation swimming controls normalized to cage controls.** To compare c-Fos positive cell densities for exploration and exploitation swimming control mice, they are normalized to cage controls. Cage controls averages are indicated by the dotted horizontal line. \* indicate significant differences ( $q < 0.05$ , FDR corrected, Mann Whitney comparisons). Data represents mean  $\pm$  s.e.m.

Abbreviations: cortex: primary auditory (Au1), prelimbic (PrL), infralimbic (IL), cingulate 1 and 2 (Cg1, Cg2), dysgranular and granular retrosplenial (RSD, RSG), parietal and posterior parietal (Par, PostPar), medial entorhinal (MEC); striatum and dopaminergic nuclei (DA nuc): dorsomedial striatum (DMS), dorsolateral striatum (DLS), nucleus accumbens core (AcbC) and shell (AcbS), ventral tegmental area (VTA), substantia nigra pars compacta (SNC); hippocampus: dorsal CA1 (dCA1), dorsal CA3 (dCA3), ventral CA1 (vCA1), ventral CA3 (vCA3), dorsal CA2 (dCA2), dorsal and ventral dentate gyrus (dDG, vDG); cerebellum: lobules IV/V (Lob IV/V), VI (Lob VI), VII (Lob VII), IX (Lob IX), X (Lob X), dentate (Dent N), fastigial (Fast N) and interpositus nuclei (IntP N).



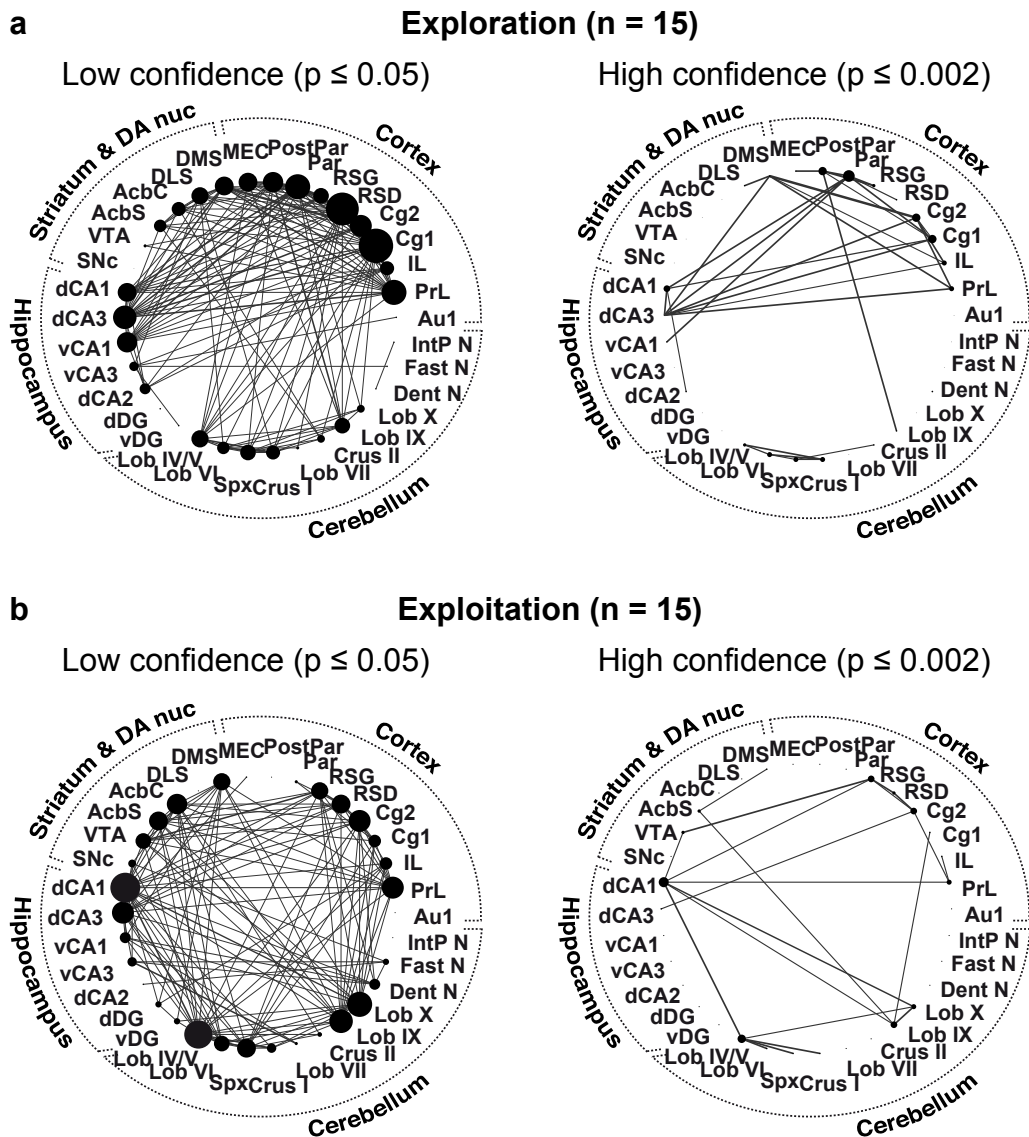

**Supplementary Figure 4: Low and high confidence networks of sequence-based memory acquisition.** Network graphs for exploration (a) and exploitation (b) mice normalized on exploration and exploitation swimming controls, respectively, were generated by thresholding inter-regional c-Fos correlations using a low confidence threshold ( $p \geq 0.51$ , corresponding to a two-tailed significance level of  $p \leq 0.05$ ) or a high confidence threshold ( $p \geq 0.73$ , corresponding to a two-tailed significance level of  $p \leq 0.002$ ). The main features observed at a  $p$  level inferior or equal to 0.01 were maintained across different thresholds. Abbreviations: cortex: primary auditory (Au1), prelimbic (PrL), infralimbic (IL), cingulate 1 and 2 (Cg1, Cg2), dysgranular and granular retrosplenial (RSD, RSG), parietal and posterior parietal (Par, PostPar), medial entorhinal (MEC); striatum and dopaminergic nuclei (DA nuc): dorsomedial striatum (DMS), dorsolateral striatum (DLS), nucleus accumbens core (AcbC) and shell (AcbS), ventral tegmental area (VTA), substantia nigra pars compacta (Snc); hippocampus: dorsal CA1 (dCA1), dorsal CA3 (dCA3), ventral CA1 (vCA1), ventral CA3 (vCA3), dorsal CA2 (dCA2), dorsal and ventral dentate gyrus (dDG, vDG); cerebellum: lobules IV/V (Lob IV/V), VI (Lob VI), VII (Lob VII), IX (Lob IX), X (Lob X), Simplex (Spx), dentate (Dent N), fastigial (Fast N) and interpositus nuclei (IntP N).

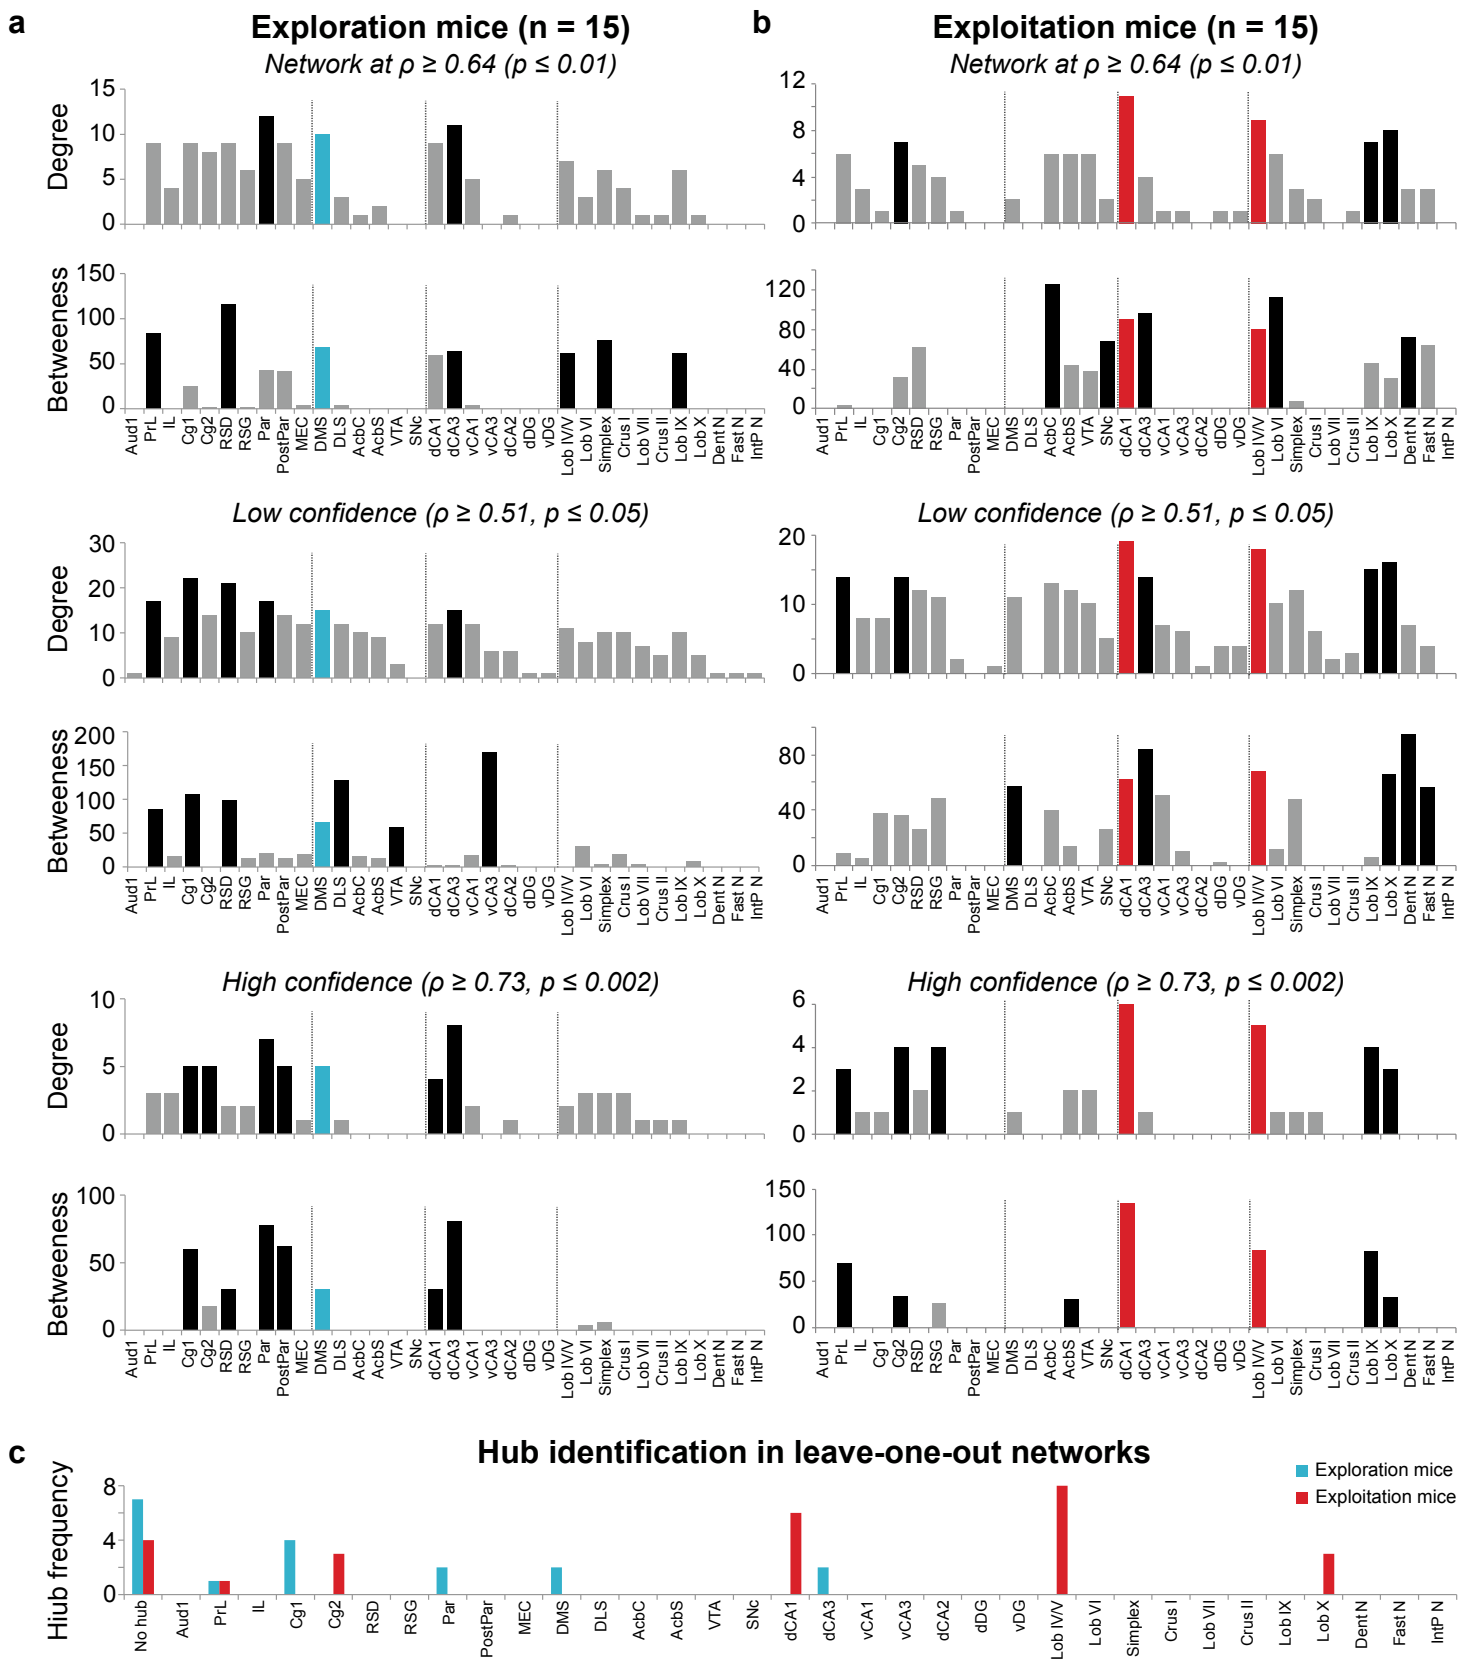

**Supplementary Figure 5: Hub identification in exploration (a), exploitation (b) mice and ‘leave-one-out’ networks (c).** Hub regions were identified as regions ranked above the 80th percentile for degree and betweenness across the three confidence levels’ networks:  $\rho \geq 0.64$ ,  $\rho \geq 0.51$ ,  $\rho \geq 0.73$ . Regions above the 80th percentile within each confidence level are highlighted in black. Hub regions are identified in blue (a) and red (b) for exploration and exploitation mice, respectively. In ‘leave-one-out’ analysis, a majority of exploration networks did not have hubs whereas dCA1 and lobule IV/V were the most often hub regions of exploitation leave-one-out networks (c).

Abbreviations: cortex: primary auditory (Au1), prelimbic (PrL), infralimbic (IL), cingulate 1 and 2 (Cg1, Cg2), dysgranular and granular retrosplenial (RSD, RSG), parietal and posterior parietal (Par, PostPar), medial entorhinal (MEC); striatum and dopaminergic nuclei (DA nuc): dorsomedial striatum (DMS), dorsolateral striatum (DLS), nucleus accumbens core (AcBc) and shell (AcBs), ventral tegmental area (VTA), substantia nigra pars compacta (SNc); hippocampus: dorsal CA1 (dCA1), dorsal CA3 (dCA3), ventral CA1 (vCA1), ventral CA3 (vCA3), dorsal CA2 (dCA2), dorsal and ventral dentate gyrus (dDG, vDG); cerebellum: lobules IV/V (Lob IV/V), VI (Lob VI), VII (Lob VII), IX (Lob IX), X (Lob X), dentate (Dent N), fastigial (Fast N) and interpositus nuclei (IntP N).

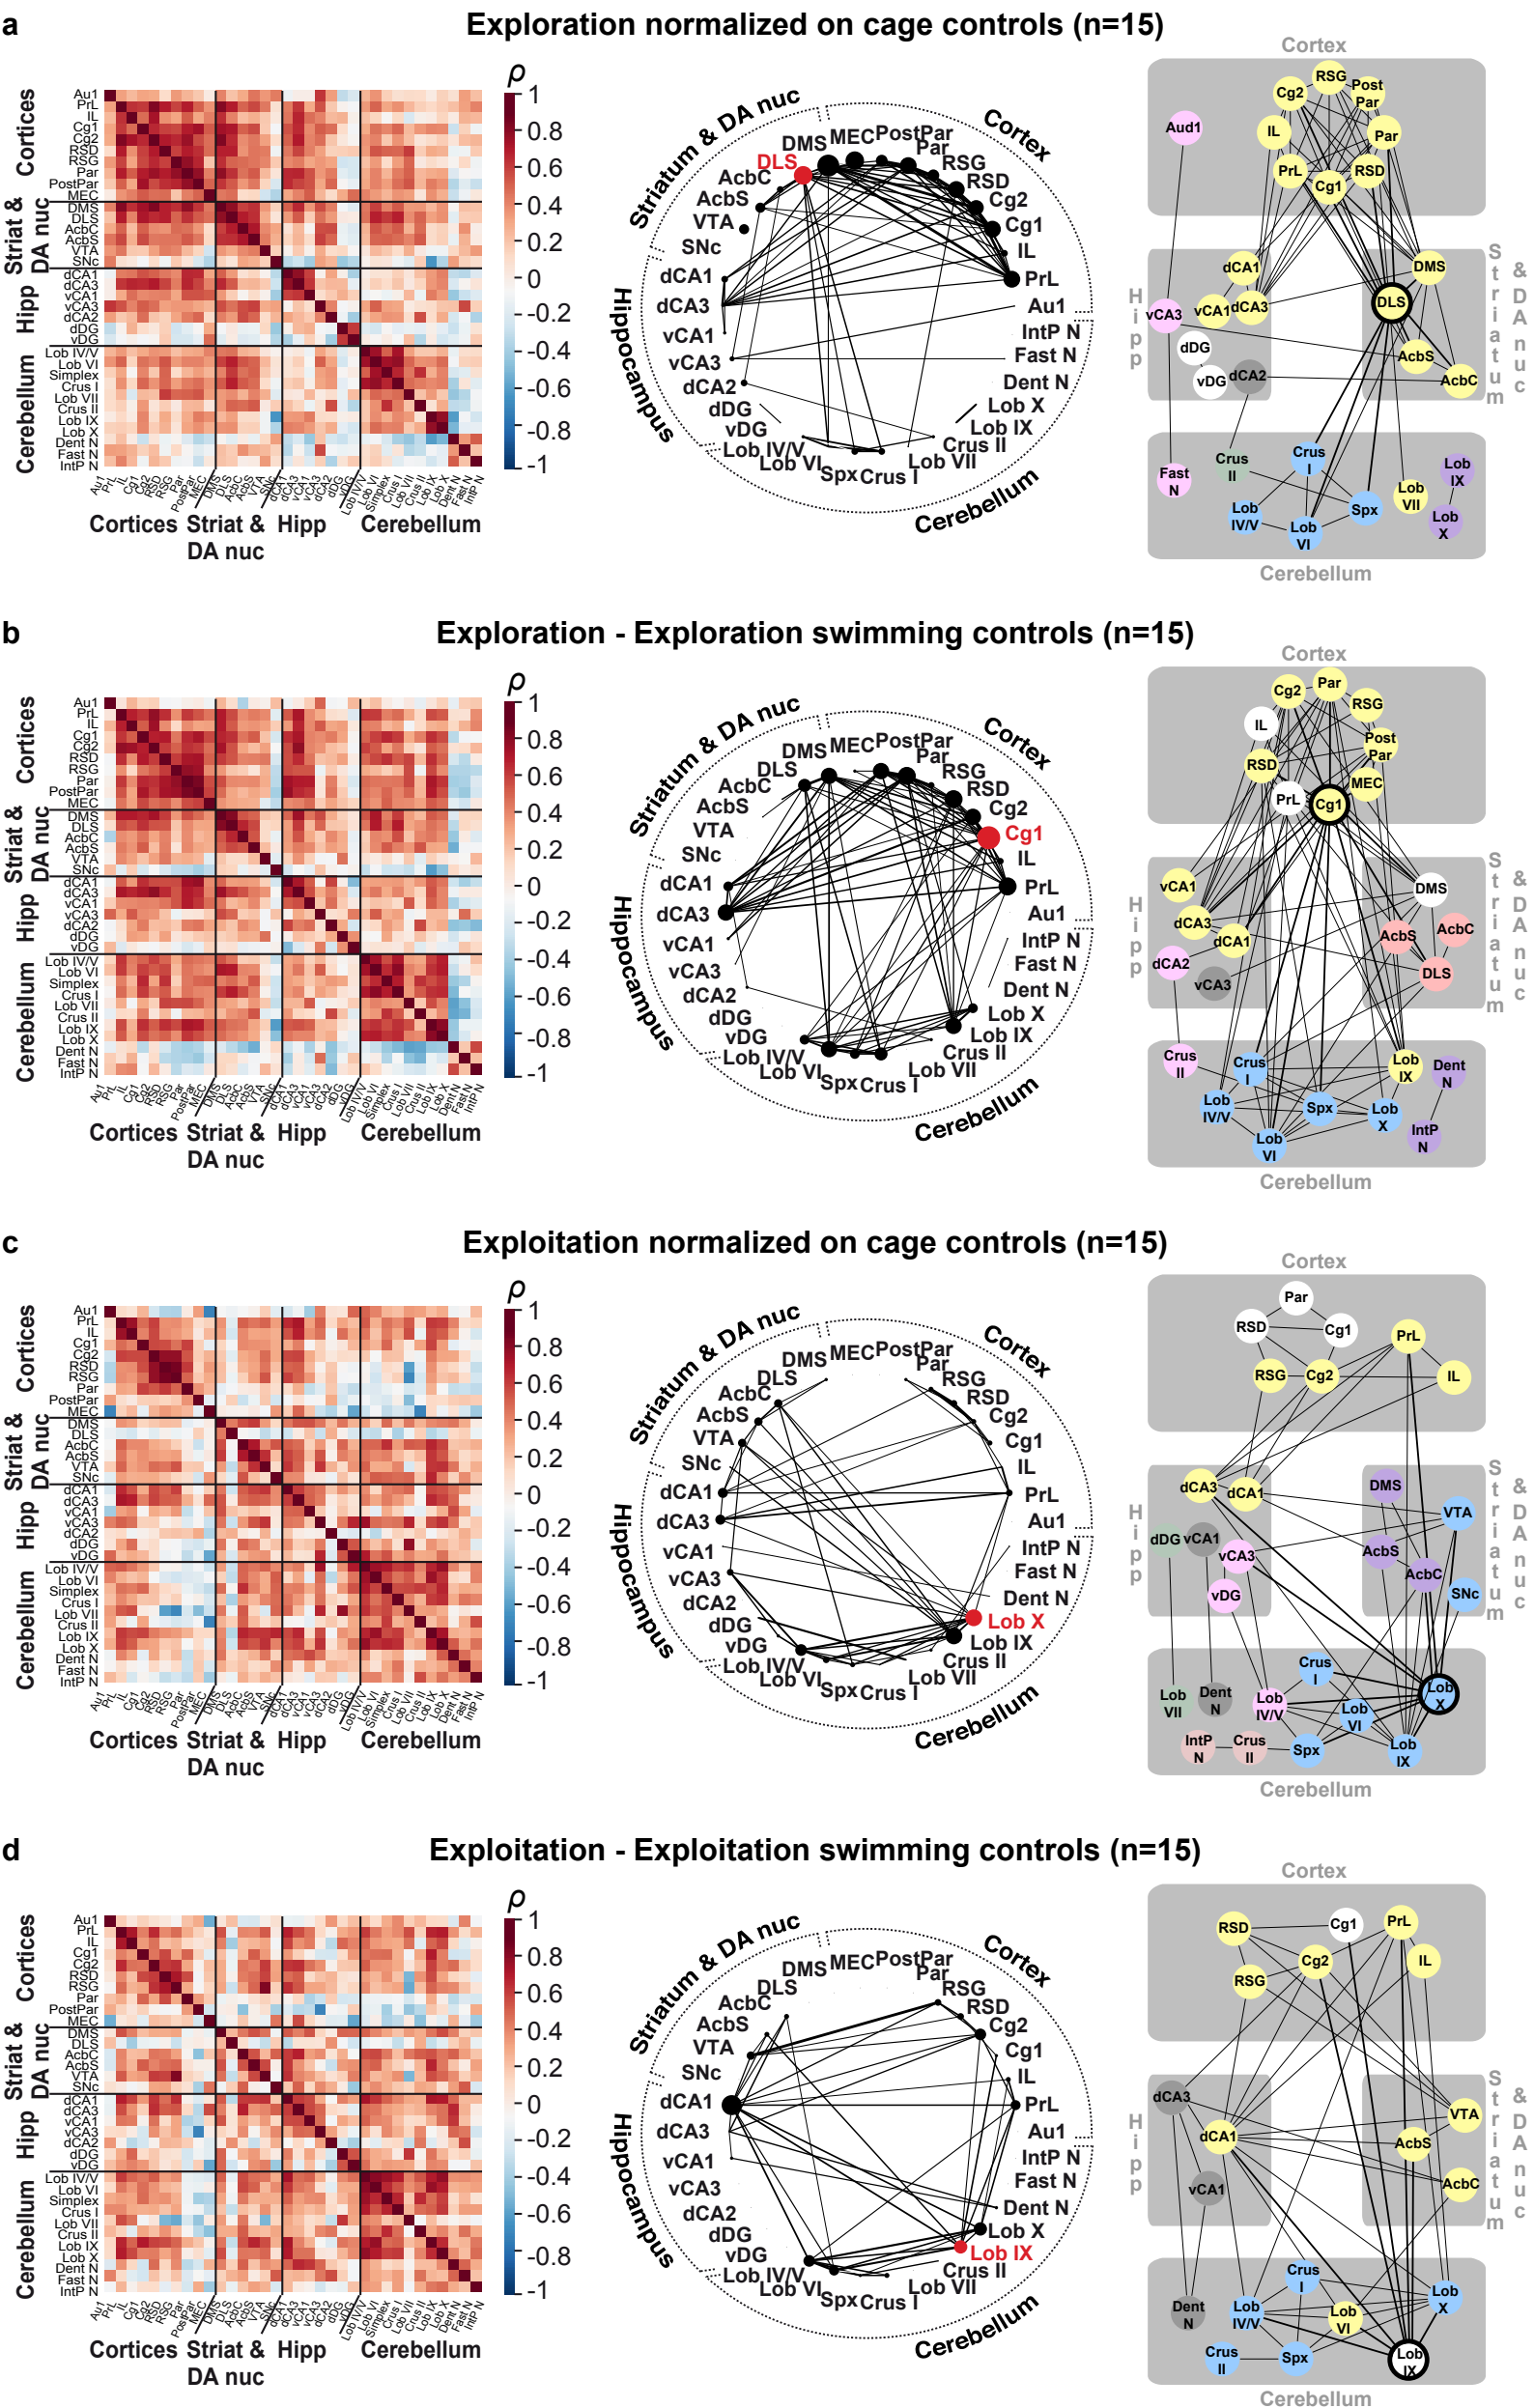



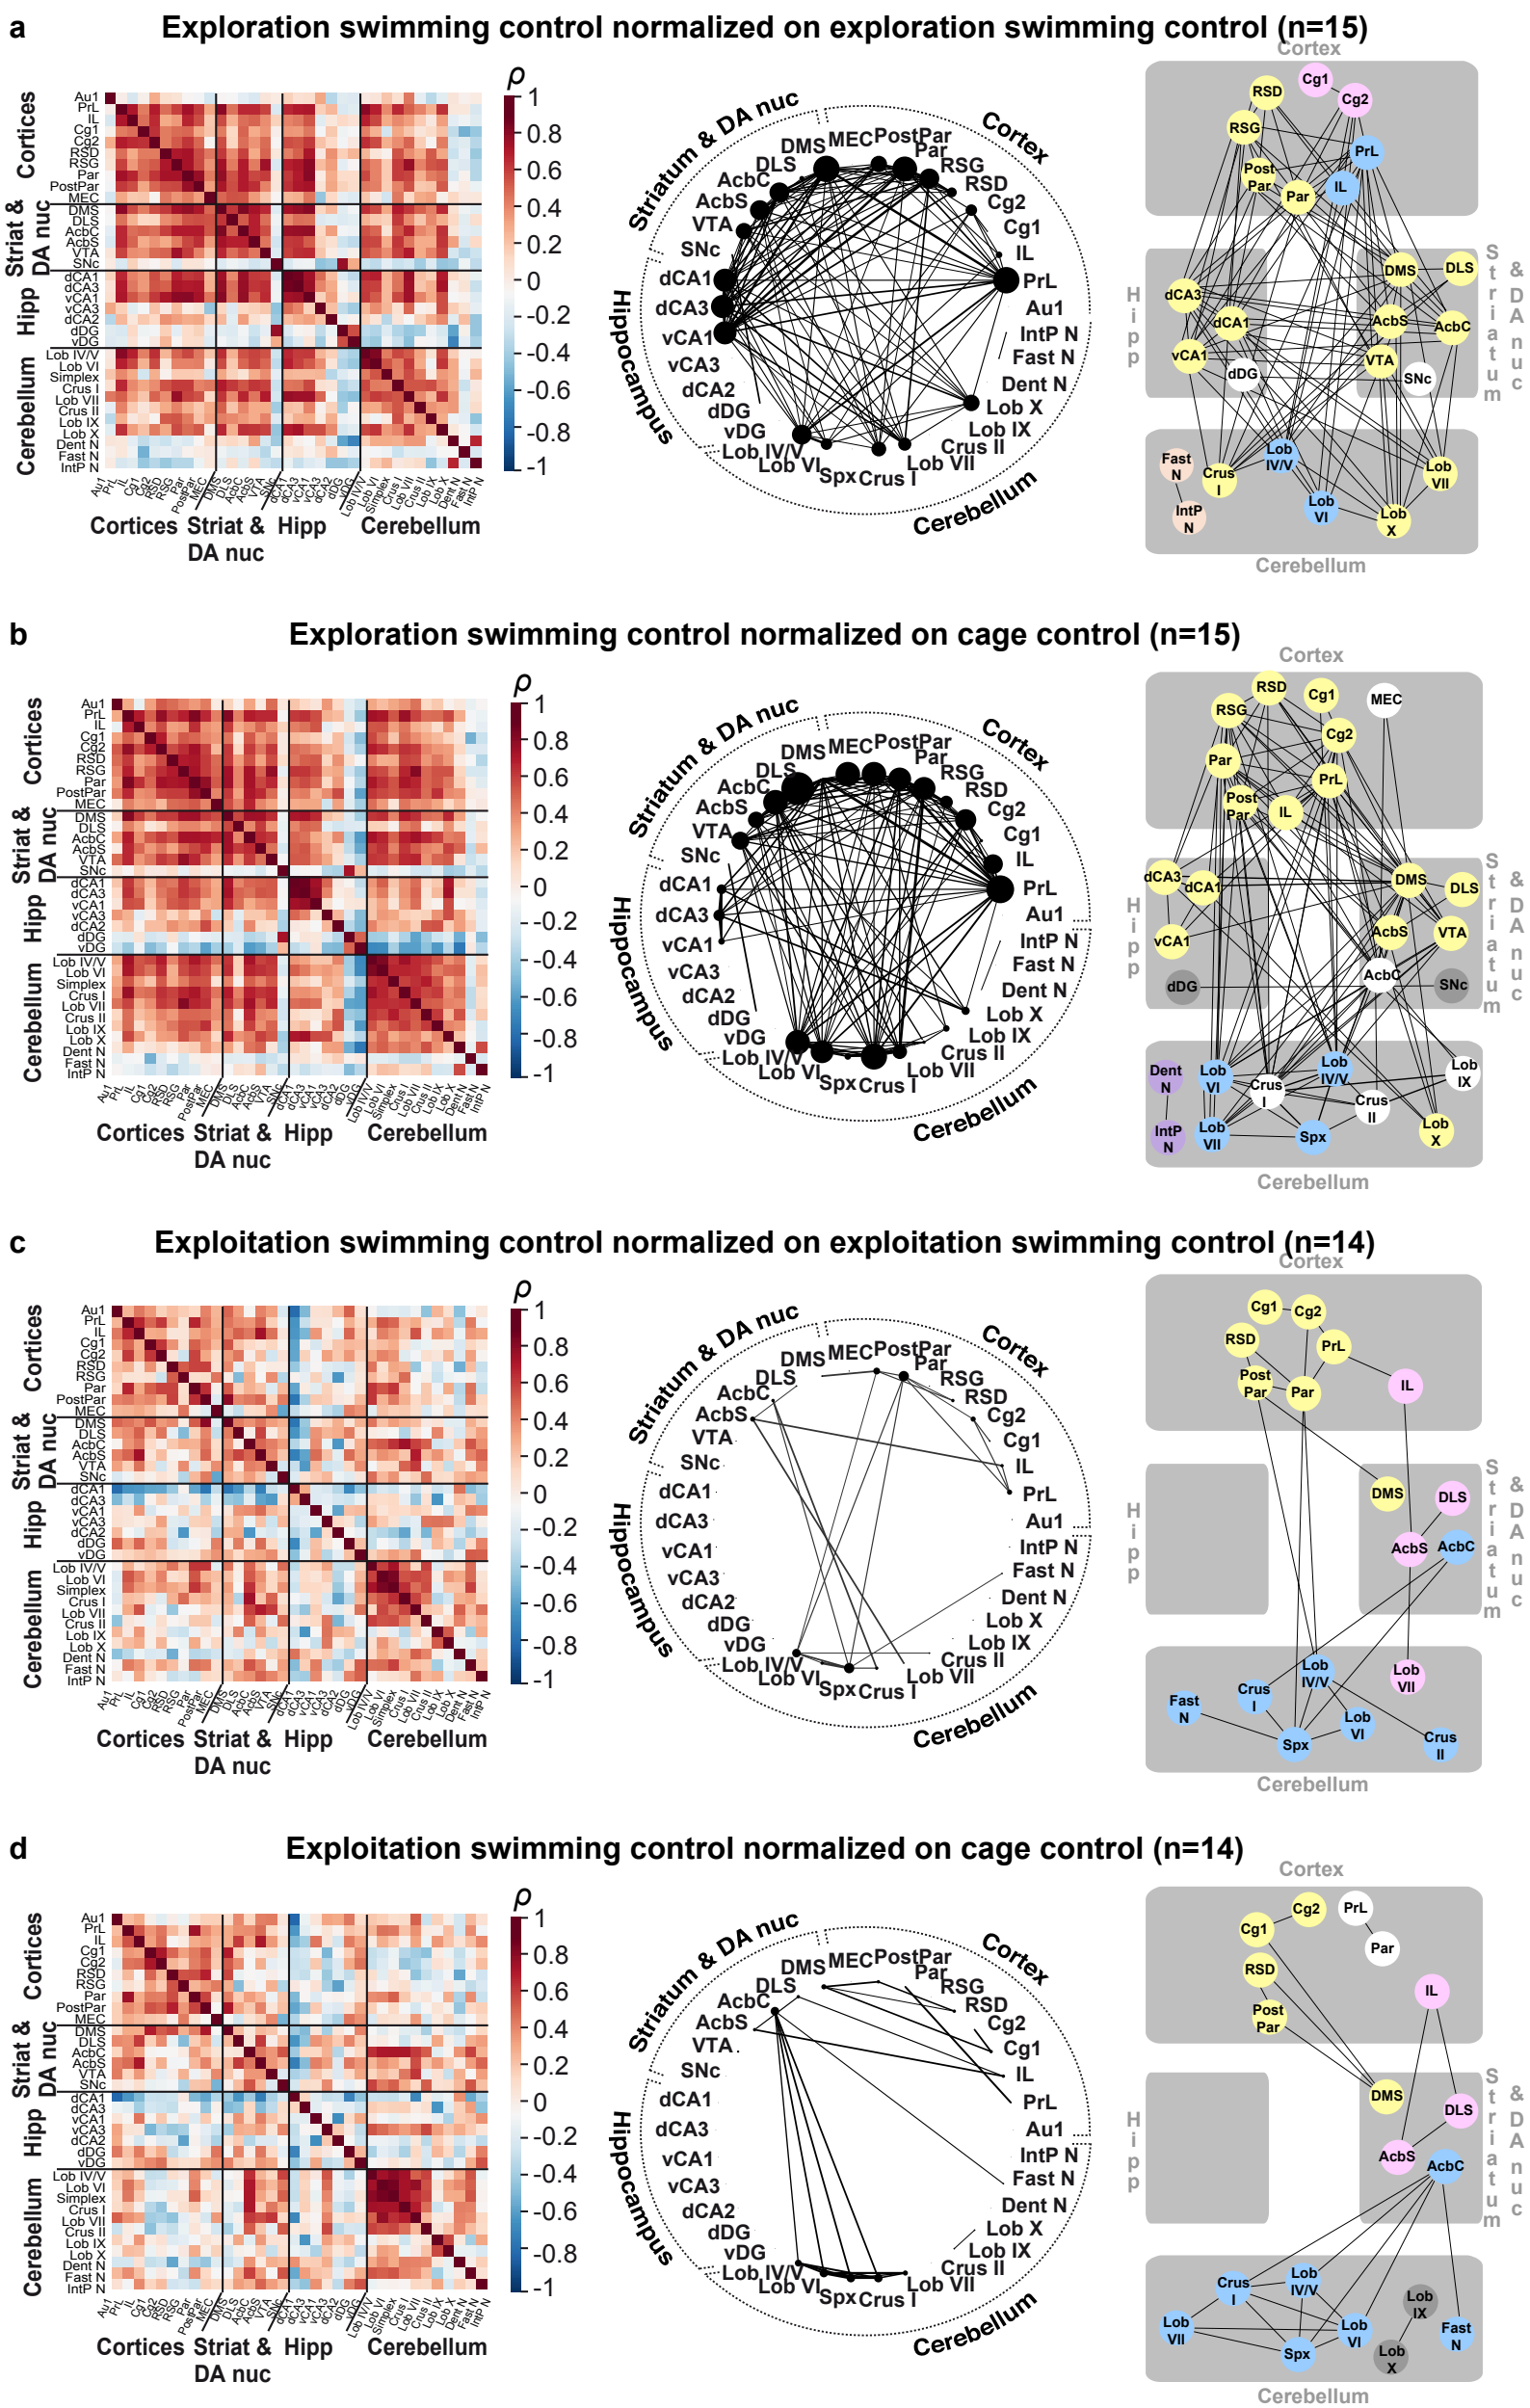



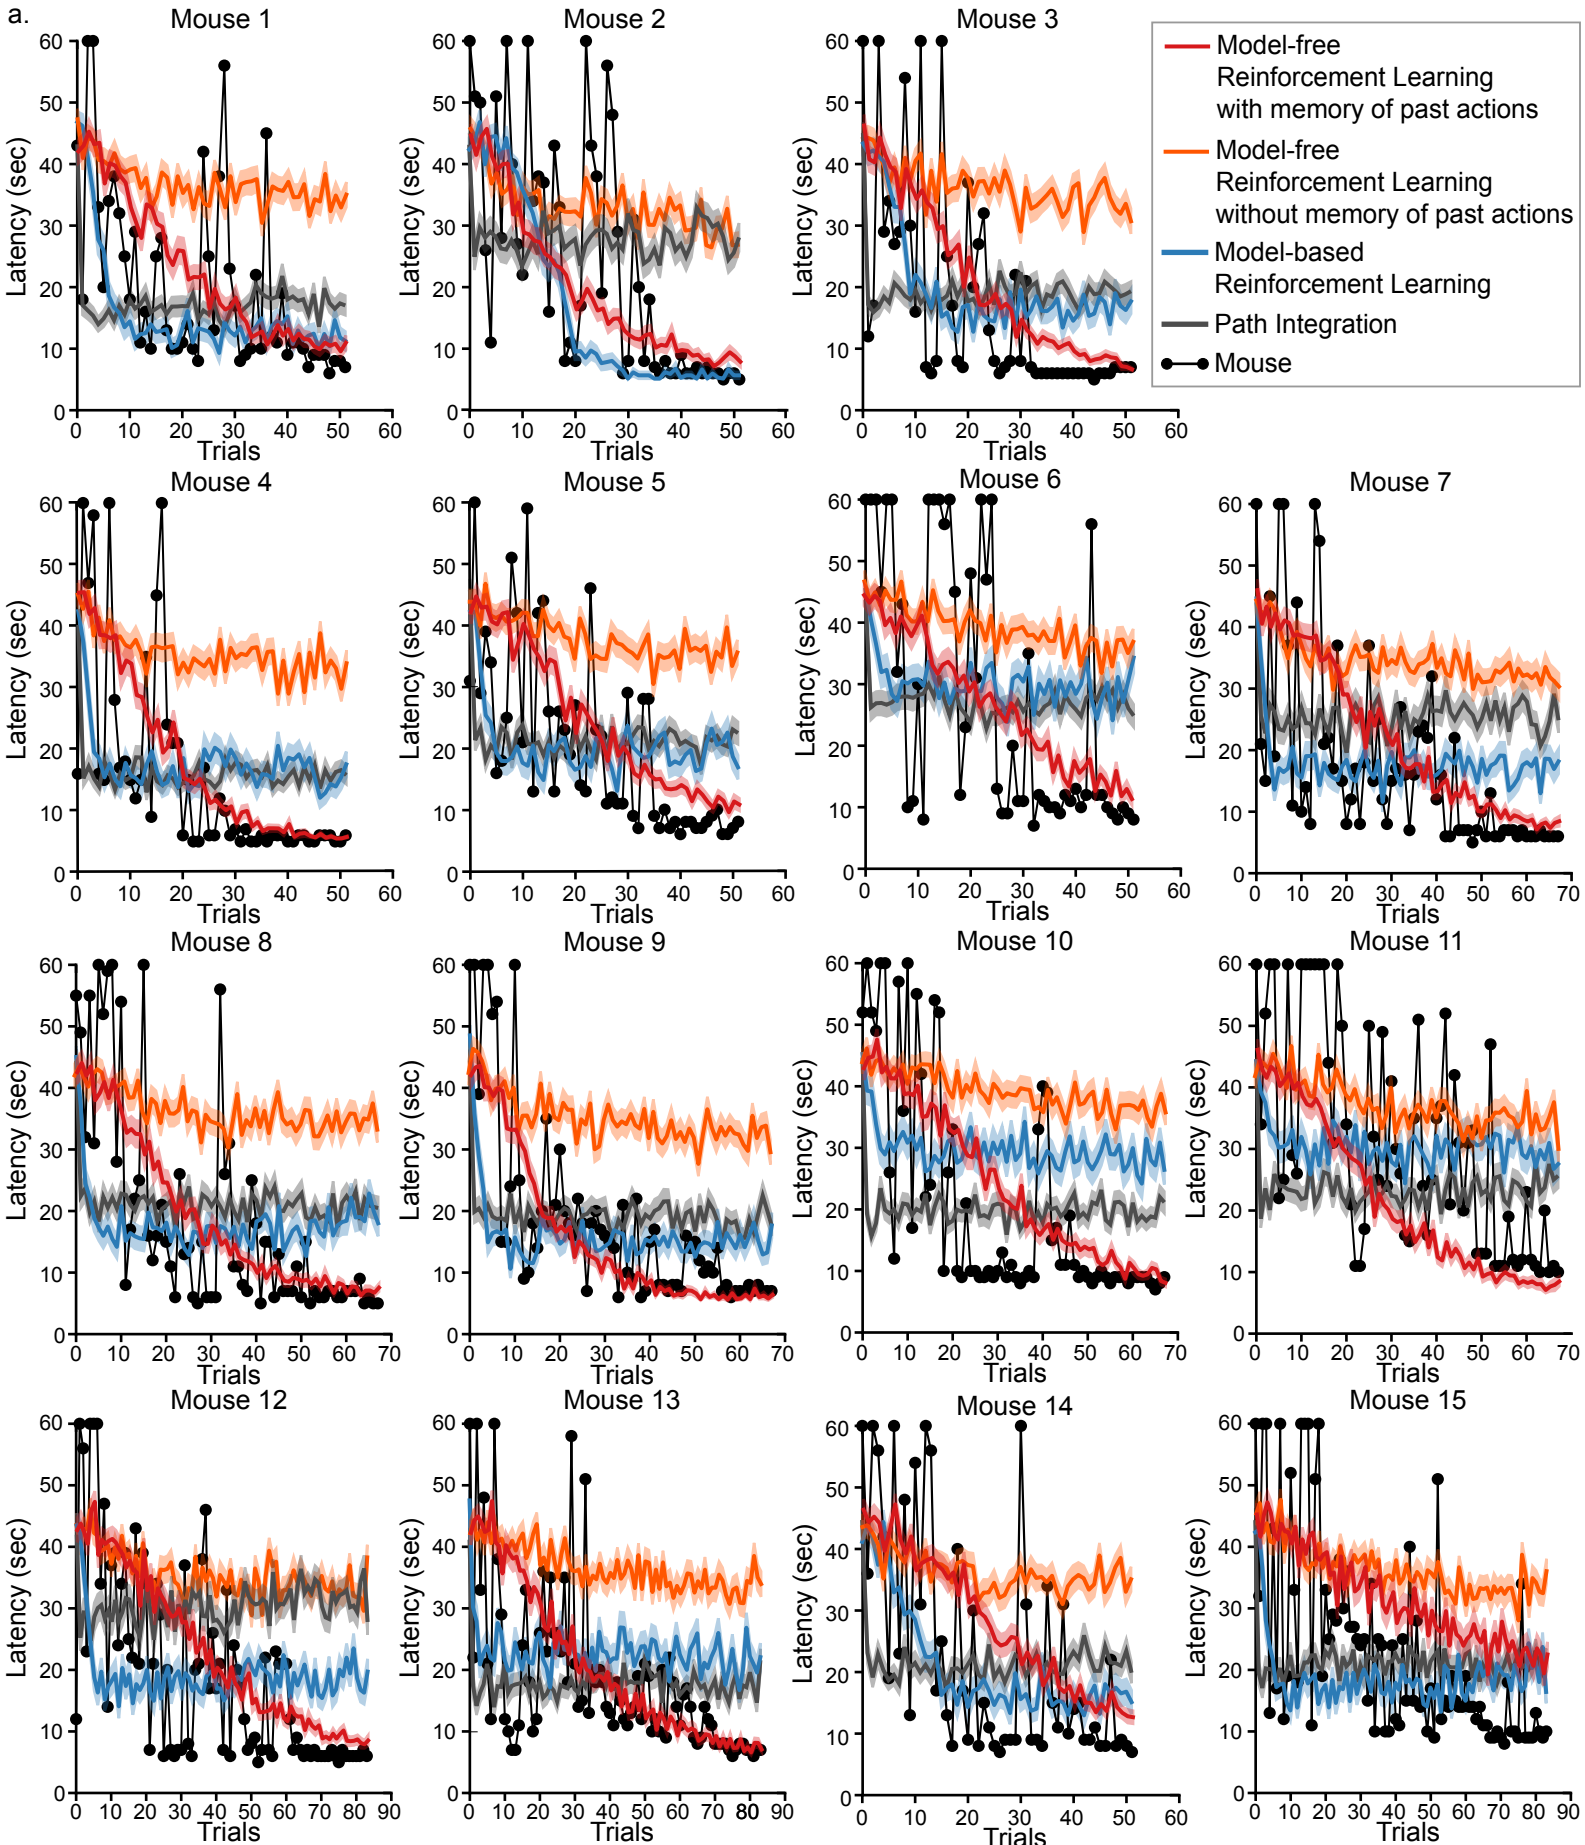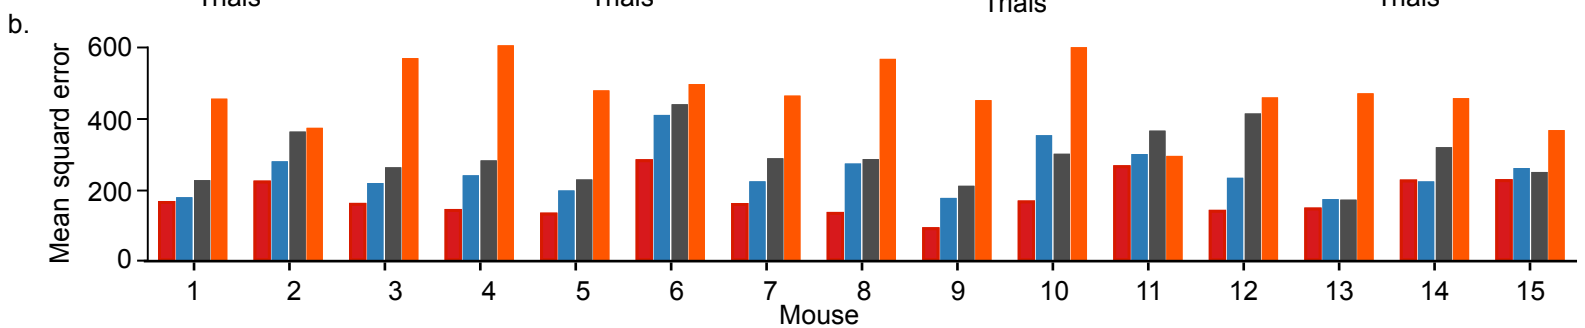

**Supplementary Figure 8: Individual simulations for model-free reinforcement learning with and without memory, model-based and path integration models. (a)** For each exploitation mouse, the optimal parameter set identified for model-free reinforcement learning with memory (red) or without memory (orange), model-based reinforcement learning (blue) and path integration (grey) was simulated on 100 freely choosing agents to test its ability to reproduce the behavioral data (black). Corresponding values for the parameters ( $\eta$ , the learning rate;  $\beta$ , the exploitation-exploration trade-off;  $\gamma$ , the discount factor for RL or  $\sigma$  the error on position estimation for path integration) are in **Supplementary Table 4**. Data represent mean  $\pm$  s.e.m. **(b)** Mean-squared error (MSE) computed between observed behavior and model simulations using the best-fitting parameters identifying by log-likelihood analysis. Note that in all mice but one (14), the MSE is minimal for the model-free algorithm (in red).

**a Hippocampal Dorsal CA1**

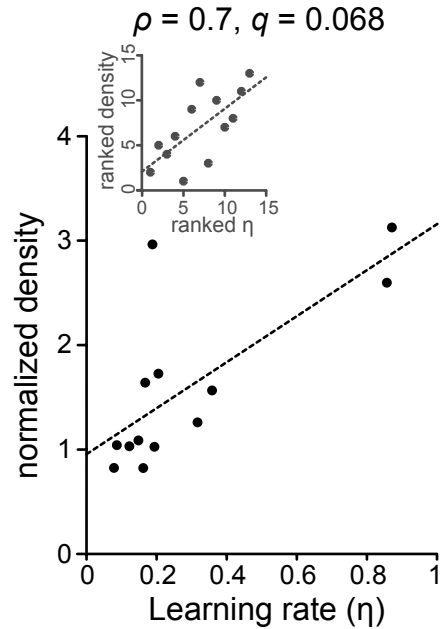

**Hippocampal Ventral CA3**

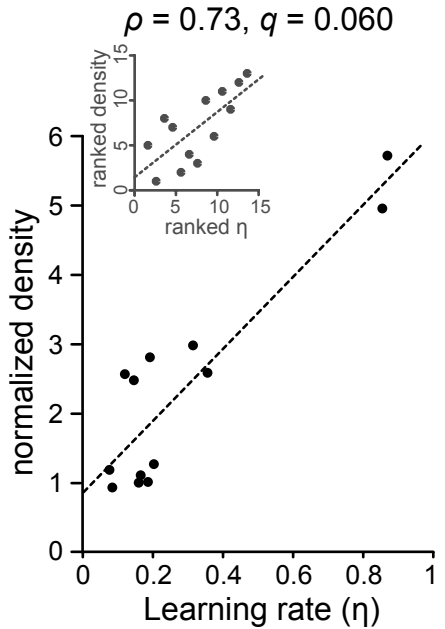

**b Cerebellar Lobule IV/V**

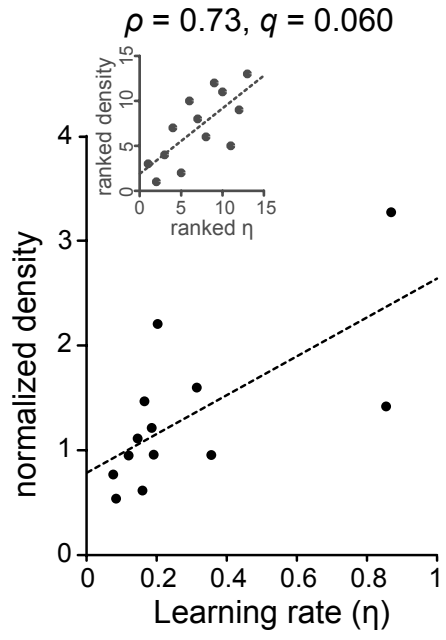

**Cerebellar Crus I**

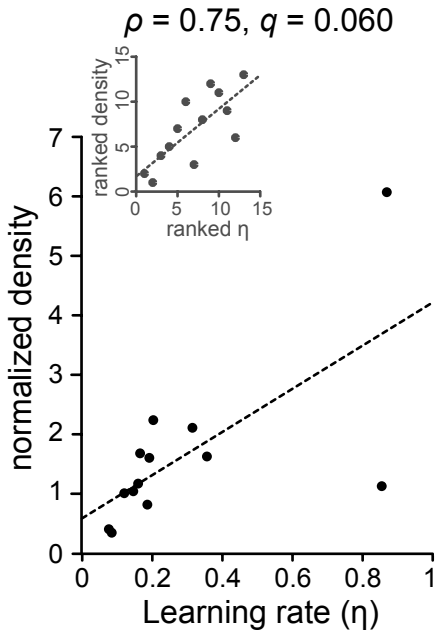

**Cerebellar Fastigial nucleus**

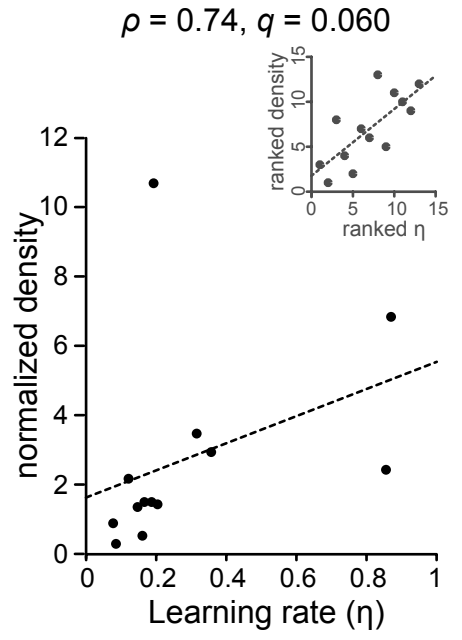

**Supplementary Figure 9: Neural correlates of the learning rate.** Hippocampal (a) and cerebellar (b) structures showed a tendency for correlations between c-Fos positive cell densities and individual learning rates estimated for the model-free reinforcement model with a memory of past actions. ( $q < 0.07$ , FDR corrected, Spearman correlation). The main plot shows the correlation on the raw data and the inset in the top right hand side shows the same correlation on the ranked data, which is used to calculate Spearman's correlation. Data represent mean  $\pm$  s.e.m.

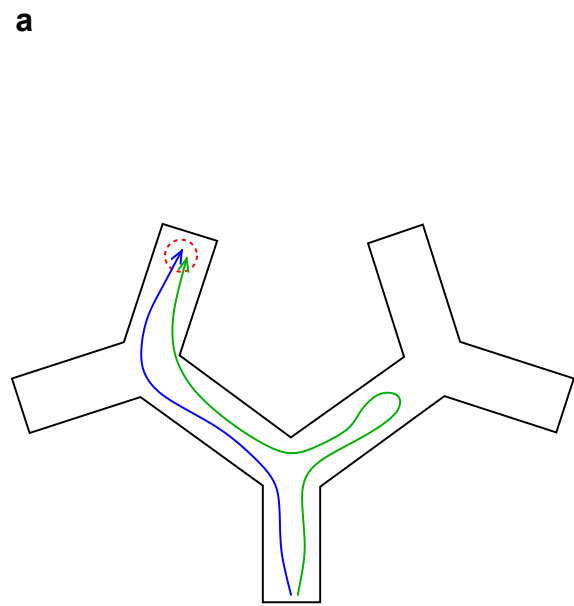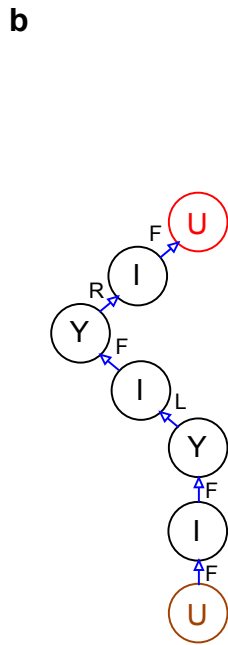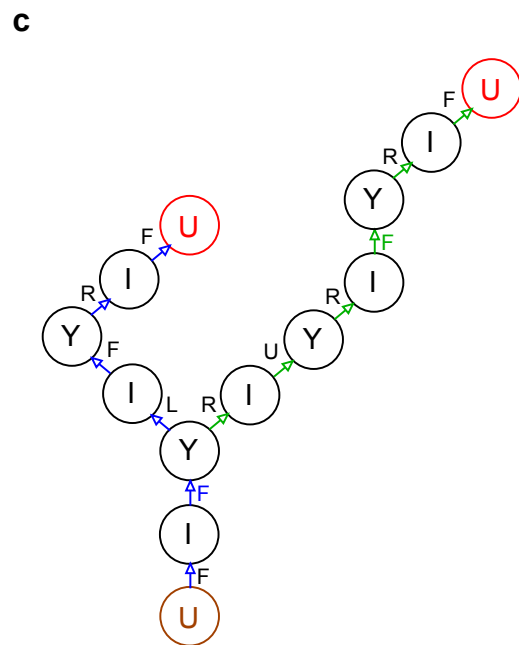

**Supplementary Figure 10: Model-based algorithm internal representation.** (a) Two trajectories experimented in the maze. (b) Internal graph built after the execution of the blue trajectory. (c) Updated graph after the execution of the green trajectory. The node in brown is the initial state, nodes in red are those where reward has been obtained ( $R=1$ ), the color of transitions indicates during which trajectory they were created, and is strictly illustrative. The states were based on sensory inputs only, they were thus ambiguous as many different positions in the maze generated the same perception. Still, the states were disambiguated by their position in the graph. For example, in the blue trajectory presented in (a) three identical corridors (I) were experienced and thus stored in the internal graph (b), the first one was reached by choosing the F action from the initial state, the second one was reached after a F-F-L sequence of actions, and the third one with the F-F-L-F-R sequence. Note that no backtracking memory was implemented, so that, when one agent made a U-turn, it was not aware that it may afterward go back to a previously experienced node (in (c), the green trajectory experienced after the blue one led to the addition of a new branch, with another reward node, while these two reward nodes corresponded to the same place in the maze).



| Region   | Mann-Whitney U-tests                           |          |          |          |                                                  |          |                        |                        |
|----------|------------------------------------------------|----------|----------|----------|--------------------------------------------------|----------|------------------------|------------------------|
|          | Exploration vs<br>Exploration Swimming Control |          |          |          | Exploitation vs<br>Exploitation Swimming Control |          |                        |                        |
|          | <i>U</i>                                       | <i>z</i> | <i>p</i> | <i>q</i> | <i>U</i>                                         | <i>z</i> | <i>p</i>               | <i>q</i>               |
| Au1      | 113                                            | 0        | 1.0      | 1.03     | 107.5                                            | 0.087    | 0.93                   | 0.96                   |
| PrL      | 100.5                                          | -0.48    | 0.63     | 0.8      | 39.5                                             | -2.8     | 4.5 x 10 <sup>-3</sup> | 0.019                  |
| IL       | 87.5                                           | -1       | 0.31     | 0.55     | 50.5                                             | -2.4     | 0.018                  | 0.045                  |
| Cg1      | 83.5                                           | -1.2     | 0.24     | 0.9      | 64.5                                             | -1.7     | 0.081                  | 0.16                   |
| Cg2      | 106                                            | -0.25    | 0.8      | 0.94     | 25.5                                             | -3.4     | 5.6 x 10 <sup>-5</sup> | 6.4 x 10 <sup>-3</sup> |
| RSD      | 85                                             | -1.1     | 0.26     | 0.89     | 45                                               | -2.6     | 9.3 x 10 <sup>-3</sup> | 0.032                  |
| RSG      | 102                                            | -0.41    | 0.68     | 0.82     | 34                                               | -3.1     | 2.1 x 10 <sup>-3</sup> | 0.014                  |
| Par      | 109.5                                          | -0.1     | 0.92     | 0.97     | 30                                               | -3.3     | 1.1 x 10 <sup>-3</sup> | 9.7 x 10 <sup>-3</sup> |
| PostPar  | 88.5                                           | -0.97    | 0.33     | 0.53     | 23                                               | -3.6     | 3.7 x 10 <sup>-4</sup> | 6.3 x 10 <sup>-3</sup> |
| MEC      | 86.5                                           | -1.1     | 0.29     | 0.62     | 77                                               | -0.94    | 0.35                   | 0.47                   |
| DMS      | 98.5                                           | -0.56    | 0.58     | 0.82     | 18.5                                             | -3.8     | 1.7 x 10 <sup>-4</sup> | 5.9 x 10 <sup>-3</sup> |
| DLS      | 79.5                                           | -1.3     | 0.18     | 1.5      | 72.5                                             | -1.4     | 0.16                   | 0.25                   |
| AcbC     | 71                                             | -1.7     | 0.089    | 3.02     | 99                                               | -0.24    | 0.810                  | 0.95                   |
| AcbS     | 108.5                                          | -0.150   | 0.88     | 1.5      | 74                                               | -1.3     | 0.18                   | 0.27                   |
| VTA      | 144                                            | 1.3      | 0.2      | 1.30     | 117.5                                            | 0.52     | 0.60                   | 0.76                   |
| SNC      | 99.5                                           | -0.52    | 0.60     | 0.82     | 111                                              | 0.24     | 0.81                   | 0.92                   |
| dCA1     | 98                                             | -0.58    | 0.56     | 0.83     | 48                                               | -2.5     | 0.014                  | 0.039                  |
| dCA3     | 85.5                                           | -1.10    | 0.27     | 0.71     | 46.5                                             | -2.5     | 0.011                  | 0.035                  |
| vCA1     | 85                                             | -1.10    | 0.26     | 0.81     | 67                                               | -1.60    | 0.10                   | 0.18                   |
| vCA3     | 78                                             | -1.40    | 0.16     | 1.80     | 34                                               | -3.1     | 2.1 x 10 <sup>-3</sup> | 0.012                  |
| dCA2     | 147                                            | 1.40     | 0.16     | 2.7      | 70                                               | -1.50    | 0.13                   | 0.21                   |
| dDG      | 138.5                                          | 1.10     | 0.29     | 0.58     | 76.5                                             | -1.20    | 0.22                   | 0.31                   |
| vDG      | 100                                            | -0.50    | 0.62     | 0.81     | 98                                               | -0.28    | 0.78                   | 0.94                   |
| Lob IV/V | 87                                             | -1       | 0.30     | 0.57     | 68                                               | -1.60    | 0.11                   | 0.19                   |
| Lob VI   | 86                                             | -1.10    | 0.28     | 0.68     | 34.5                                             | -3.10    | 2.2 x 10 <sup>-3</sup> | 0.011                  |
| Simplex  | 85.5                                           | -1.1     | 0.27     | 0.77     | 87.5                                             | -0.74    | 0.46                   | 0.60                   |
| Crus I   | 88.5                                           | -0.98    | 0.33     | 0.56     | 58                                               | -2       | 0.042                  | 0.09                   |
| Lob VII  | 58                                             | -1.10    | 0.29     | 0.65     | 18                                               | 0        | 0.033                  | 0.074                  |
| Crus II  | 81                                             | -1.30    | 0.20     | 1.10     | 107.5                                            | 0.087    | 0.93                   | 0.99                   |
| Lob IX   | 83.5                                           | -1.20    | 0.24     | 1        | 89.5                                             | -0.049   | 0.96                   | 0.96                   |
| Lob X    | 112.5                                          | 0        | 1        | 1        | 110.5                                            | 0.22     | 0.83                   | 0.91                   |
| Dent N   | 92.5                                           | -0.81    | 0.42     | 0.65     | 65                                               | -1.70    | 0.085                  | 0.16                   |
| Fast N   | 116.5                                          | 0.15     | 0.88     | 0.97     | 49                                               | -2.4     | 0.015                  | 0.04                   |
| IntP N   | 142                                            | 1.20     | 0.23     | 1.10     | 40                                               | -2.8     | 4.9 x 10 <sup>-3</sup> | 0.018                  |

**Supplementary Table 1: Comparisons of c-Fos positive cell densities normalized on their respective swimming controls.** False discovery rate (FDR) corrected *p* values, *q*, inferior to 0.05 are highlighted in red.

Abbreviations: cortex: primary auditory (Au1), prelimbic (PrL), infralimbic (IL), cingulate 1 and 2 (Cg1, Cg2), dysgranular and granular retrosplenial (RSD, RSG), parietal and posterior parietal (Par, PostPar), medial entorhinal (MEC); striatum and dopaminergic nuclei (DA nuc): dorsomedial striatum (DMS), dorsolateral striatum (DLS), nucleus accumbens core (AcbC) and shell (AcbS), ventral tegmental area (VTA), substantia nigra pars compacta (SNc); hippocampus: dorsal CA1 (dCA1), dorsal CA3 (dCA3), ventral CA1 (vCA1), ventral CA3 (vCA3), dorsal CA2 (dCA2), dorsal and ventral dentate gyrus (dDG, vDG); cerebellum: lobules IV/V (Lob IV/V), VI (Lob VI), VII (Lob VII), IX (Lob IX), X (Lob X), dentate (Dent N), fastigial (Fast N) and interpositus nuclei (IntP N).

| Region   | Kruskal-Wallis on exploration, exploitation, swimming controls and cage control |                       |                       | Mann-Whitney U-tests        |          |                       |                       |                              |          |                       |                       |                             |          |                       |                       |          |
|----------|---------------------------------------------------------------------------------|-----------------------|-----------------------|-----------------------------|----------|-----------------------|-----------------------|------------------------------|----------|-----------------------|-----------------------|-----------------------------|----------|-----------------------|-----------------------|----------|
|          | <i>H</i>                                                                        | <i>p</i>              | <i>q</i>              | Exploration vs Cage Control |          |                       |                       | Exploitation vs Cage Control |          |                       |                       | Exploration vs Exploitation |          |                       |                       |          |
|          | <i>U</i>                                                                        | <i>z</i>              | <i>p</i>              | <i>q</i>                    | <i>U</i> | <i>z</i>              | <i>p</i>              | <i>q</i>                     | <i>U</i> | <i>z</i>              | <i>p</i>              | <i>q</i>                    | <i>U</i> | <i>z</i>              | <i>p</i>              | <i>q</i> |
| Au1      | $H_{4,82} = 50.9$                                                               | $2.2 \times 10^{-10}$ | $6.3 \times 10^{-10}$ | 356                         | 5.07     | $4.02 \times 10^{-7}$ | $1.17 \times 10^{-6}$ | 315                          | 3.88     | $1.03 \times 10^{-4}$ | $2.05 \times 10^{-4}$ | 188                         | 3.09     | $2.0 \times 10^{-3}$  | $5.81 \times 10^{-3}$ |          |
| PrL      | $H_{4,82} = 63.8$                                                               | $4.6 \times 10^{-13}$ | $5.2 \times 10^{-12}$ | 360                         | 5.18     | $2.2 \times 10^{-7}$  | $8.79 \times 10^{-7}$ | 359                          | 5.15     | $2.56 \times 10^{-7}$ | $1.37 \times 10^{-6}$ | 177                         | 2.65     | $7.93 \times 10^{-3}$ | $1.59 \times 10^{-2}$ |          |
| IL       | $H_{4,82} = 64.1$                                                               | $3.9 \times 10^{-13}$ | $6.7 \times 10^{-12}$ | 360                         | 5.18     | $2.19 \times 10^{-7}$ | $3.51 \times 10^{-6}$ | 356                          | 5.05     | $4.37 \times 10^{-7}$ | $2.0 \times 10^{-6}$  | 186                         | 3.03     | $2.46 \times 10^{-3}$ | $6.55 \times 10^{-3}$ |          |
| Cg1      | $H_{4,82} = 58.1$                                                               | $7.1 \times 10^{-12}$ | $4.0 \times 10^{-11}$ | 360                         | 5.18     | $2.19 \times 10^{-7}$ | $2.34 \times 10^{-6}$ | 360                          | 5.18     | $2.19 \times 10^{-7}$ | $3.51 \times 10^{-6}$ | 150                         | 1.53     | 0.125                 | 0.19                  |          |
| Cg2      | $H_{4,82} = 59.5$                                                               | $3.6 \times 10^{-12}$ | $3.1 \times 10^{-11}$ | 360                         | 5.18     | $2.19 \times 10^{-7}$ | $1.75 \times 10^{-6}$ | 360                          | 5.18     | $2.19 \times 10^{-7}$ | $2.34 \times 10^{-6}$ | 109                         | -0.124   | 0.901                 | 0.93                  |          |
| RSD      | $H_{4,82} = 37.1$                                                               | $1.7 \times 10^{-7}$  | $2.4 \times 10^{-7}$  | 330                         | 4.32     | $1.59 \times 10^{-5}$ | $2.12 \times 10^{-5}$ | 344                          | 4.72     | $2.36 \times 10^{-6}$ | $8.38 \times 10^{-6}$ | 101                         | -0.456   | 0.648                 | 0.741                 |          |
| RSG      | $H_{4,82} = 38.4$                                                               | $9.1 \times 10^{-8}$  | $1.5 \times 10^{-7}$  | 343                         | 4.69     | $2.71 \times 10^{-6}$ | $5.11 \times 10^{-6}$ | 341                          | 4.63     | $3.59 \times 10^{-6}$ | $9.58 \times 10^{-6}$ | 85.5                        | -1.1     | 0.272                 | 0.378                 |          |
| Par      | $H_{4,82} = 58.7$                                                               | $5.4 \times 10^{-12}$ | $3.7 \times 10^{-11}$ | 360                         | 5.18     | $2.2 \times 10^{-7}$  | $1.0 \times 10^{-6}$  | 360                          | 5.18     | $2.2 \times 10^{-7}$  | $1.76 \times 10^{-6}$ | 127                         | 0.56     | 0.575                 | 0.708                 |          |
| PostPar  | $H_{4,81} = 57.8$                                                               | $8.4 \times 10^{-12}$ | $4.1 \times 10^{-11}$ | 357                         | 5.1      | $3.46 \times 10^{-7}$ | $1.11 \times 10^{-6}$ | 360                          | 5.18     | $2.18 \times 10^{-7}$ | $6.99 \times 10^{-6}$ | 116                         | 0.124    | 0.901                 | 0.901                 |          |
| MEC      | $H_{4,78} = 49.2$                                                               | $5.4 \times 10^{-10}$ | $1.4 \times 10^{-9}$  | 327                         | 5        | $5.85 \times 10^{-7}$ | $1.56 \times 10^{-6}$ | 271                          | 4.35     | $1.34 \times 10^{-5}$ | $2.86 \times 10^{-5}$ | 136                         | 1.75     | 0.08                  | 0.128                 |          |
| DMS      | $H_{4,82} = 66.8$                                                               | $1.1 \times 10^{-13}$ | $3.6 \times 10^{-12}$ | 360                         | 5.18     | $2.19 \times 10^{-7}$ | $1.4 \times 10^{-6}$  | 348                          | 4.84     | $1.32 \times 10^{-6}$ | $5.3 \times 10^{-6}$  | 212                         | 4.11     | $4.01 \times 10^{-5}$ | $6.42 \times 10^{-4}$ |          |
| DLS      | $H_{4,82} = 28.8$                                                               | $2.1 \times 10^{-5}$  | $2.8 \times 10^{-5}$  | 324                         | 4.15     | $3.38 \times 10^{-5}$ | $4.33 \times 10^{-5}$ | 219                          | 1.11     | 0.266                 | 0.283                 | 179                         | 2.74     | $6.17 \times 10^{-3}$ | $1.41 \times 10^{-2}$ |          |
| AcbC     | $H_{4,82} = 38.1$                                                               | $1.1 \times 10^{-7}$  | $1.6 \times 10^{-7}$  | 344                         | 4.72     | $2.35 \times 10^{-6}$ | $5.01 \times 10^{-6}$ | 248                          | 1.95     | 0.0513                | 0.0608                | 197                         | 3.47     | $5.29 \times 10^{-4}$ | $4.23 \times 10^{-3}$ |          |
| AcbS     | $H_{4,82} = 56.4$                                                               | $1.6 \times 10^{-11}$ | $6.2 \times 10^{-11}$ | 359                         | 5.15     | $2.56 \times 10^{-7}$ | $9.1 \times 10^{-7}$  | 304                          | 3.57     | $3.63 \times 10^{-4}$ | $6.83 \times 10^{-4}$ | 214                         | 4.17     | $3.05 \times 10^{-5}$ | $9.77 \times 10^{-4}$ |          |
| VTA      | $H_{4,82} = 45.4$                                                               | $3.3 \times 10^{-9}$  | $8.1 \times 10^{-9}$  | 341                         | 4.63     | $3.58 \times 10^{-6}$ | $5.2 \times 10^{-6}$  | 281                          | 2.89     | $3.88 \times 10^{-3}$ | $6.21 \times 10^{-3}$ | 189                         | 3.15     | $1.61 \times 10^{-3}$ | $5.72 \times 10^{-3}$ |          |
| SNC      | $H_{4,82} = 2.4$                                                                | 0.66                  | 0.66                  |                             |          |                       |                       |                              |          |                       |                       |                             |          |                       |                       |          |
| dCA1     | $H_{4,82} = 39.8$                                                               | $4.8 \times 10^{-8}$  | $9.7 \times 10^{-8}$  | 342                         | 4.65     | $3.35 \times 10^{-6}$ | $5.1 \times 10^{-6}$  | 333                          | 4.4      | $1.07 \times 10^{-5}$ | $2.44 \times 10^{-5}$ | 130                         | 0.705    | 0.481                 | 0.641                 |          |
| dCA3     | $H_{4,82} = 39.9$                                                               | $4.5 \times 10^{-8}$  | $9.6 \times 10^{-8}$  | 344                         | 4.72     | $2.35 \times 10^{-6}$ | $4.7 \times 10^{-6}$  | 340                          | 4.59     | $4.42 \times 10^{-6}$ | $1.09 \times 10^{-5}$ | 127                         | 0.56     | 0.575                 | 0.736                 |          |
| vCA1     | $H_{4,82} = 57.6$                                                               | $9.3 \times 10^{-12}$ | $3.9 \times 10^{-11}$ | 360                         | 5.18     | $2.19 \times 10^{-7}$ | $1.17 \times 10^{-6}$ | 359                          | 5.15     | $2.56 \times 10^{-7}$ | $1.64 \times 10^{-6}$ | 145                         | 1.31     | 0.191                 | 0.278                 |          |
| vCA3     | $H_{4,82} = 38.2$                                                               | $1.0 \times 10^{-7}$  | $1.5 \times 10^{-7}$  | 342                         | 4.66     | $3.12 \times 10^{-6}$ | $4.99 \times 10^{-6}$ | 343                          | 4.69     | $2.71 \times 10^{-6}$ | $7.88 \times 10^{-6}$ | 116                         | 0.124    | 0.901                 | 0.961                 |          |
| dCA2     | $H_{4,82} = 11.7$                                                               | 0.019                 | 0.020                 | 246                         | 1.89     | 0.0582                | 0.062                 | 243                          | 1.79     | 0.0733                | 0.0838                | 120                         | 0.29     | 0.771                 | 0.851                 |          |
| dDG      | $H_{4,82} = 15.9$                                                               | 0.0032                | 0.0037                | 117                         | -1.82    | 0.0689                | 0.0711                | 85                           | -2.73    | $6.36 \times 10^{-3}$ | $9.25 \times 10^{-3}$ | 126                         | 0.519    | 0.604                 | 0.715                 |          |
| vDG      | $H_{4,82} = 25.1$                                                               | $4.7 \times 10^{-5}$  | $5.9 \times 10^{-5}$  | 201                         | 0.592    | 0.554                 | 0.554                 | 81.5                         | -2.83    | $4.65 \times 10^{-3}$ | $7.09 \times 10^{-3}$ | 191                         | 3.22     | $1.3 \times 10^{-3}$  | $5.19 \times 10^{-3}$ |          |
| Lob IV/V | $H_{4,82} = 55.9$                                                               | $2.1 \times 10^{-11}$ | $6.5 \times 10^{-11}$ | 360                         | 5.18     | $2.19 \times 10^{-7}$ | $7.0 \times 10^{-6}$  | 266                          | 2.47     | 0.0135                | 0.0181                | 208                         | 3.94     | $8.12 \times 10^{-5}$ | $8.66 \times 10^{-4}$ |          |
| Lob VI   | $H_{4,78} = 56.1$                                                               | $1.8 \times 10^{-11}$ | $6.6 \times 10^{-11}$ | 300                         | 4.98     | $6.23 \times 10^{-7}$ | $1.53 \times 10^{-6}$ | 292                          | 4.7      | $2.58 \times 10^{-6}$ | $8.27 \times 10^{-6}$ | 196                         | 3.44     | $5.75 \times 10^{-4}$ | $3.68 \times 10^{-3}$ |          |
| Simplex  | $H_{4,82} = 38.6$                                                               | $8.4 \times 10^{-8}$  | $1.5 \times 10^{-7}$  | 343                         | 4.69     | $2.71 \times 10^{-6}$ | $4.82 \times 10^{-6}$ | 254                          | 2.12     | 0.0338                | 0.0416                | 189                         | 3.15     | $1.62 \times 10^{-3}$ | $5.18 \times 10^{-3}$ |          |
| Crus I   | $H_{4,82} = 39.2$                                                               | $6.2 \times 10^{-8}$  | $1.2 \times 10^{-7}$  | 343                         | 4.69     | $2.71 \times 10^{-6}$ | $4.57 \times 10^{-6}$ | 263                          | 2.37     | 0.0179                | 0.0229                | 176                         | 2.61     | $8.97 \times 10^{-3}$ | 0.0169                |          |
| Lob VII  | $H_{4,55} = 33.7$                                                               | $8.6 \times 10^{-7}$  | $1.2 \times 10^{-6}$  | 152                         | 4        | $6.35 \times 10^{-5}$ | $7.82 \times 10^{-5}$ | 90                           | 3.2      | $1.35 \times 10^{-3}$ | $2.41 \times 10^{-3}$ | 91                          | 2.79     | $5.3 \times 10^{-3}$  | 0.013                 |          |
| Crus II  | $H_{4,81} = 13.5$                                                               | $9.1 \times 10^{-3}$  | 0.010                 | 266                         | 2.78     | $5.46 \times 10^{-3}$ | $6.47 \times 10^{-3}$ | 166                          | -0.194   | 0.846                 | 0.846                 | 178                         | 2.68     | $7.45 \times 10^{-3}$ | 0.0159                |          |
| Lob IX   | $H_{4,76} = 38.3$                                                               | $9.5 \times 10^{-8}$  | $1.5 \times 10^{-7}$  | 289                         | 4.6      | $4.22 \times 10^{-6}$ | $5.87 \times 10^{-6}$ | 217                          | 3.17     | $1.53 \times 10^{-3}$ | $2.58 \times 10^{-3}$ | 149                         | 2.35     | 0.0188                | 0.0317                |          |
| Lob X    | $H_{4,81} = 40.6$                                                               | $3.2 \times 10^{-8}$  | $7.2 \times 10^{-8}$  | 332                         | 4.75     | $2.05 \times 10^{-6}$ | $4.68 \times 10^{-6}$ | 259                          | 2.57     | 0.0102                | 0.0142                | 174                         | 2.53     | 0.0114                | 0.0202                |          |
| Dent N   | $H_{4,80} = 3.9$                                                                | 0.42                  | 0.42                  |                             |          |                       |                       |                              |          |                       |                       |                             |          |                       |                       |          |
| Fast N   | $H_{4,80} = 15.9$                                                               | $3.1 \times 10^{-3}$  | $3.8 \times 10^{-3}$  | 84.5                        | -2.48    | 0.0133                | 0.0152                | 214                          | 1.5      | 0.134                 | 0.147                 | 33                          | -3.28    | $1.04 \times 10^{-3}$ | $5.55 \times 10^{-3}$ |          |
| IntP N   | $H_{4,80} = 15.5$                                                               | $3.7 \times 10^{-3}$  | $4.2 \times 10^{-3}$  | 94                          | -2.18    | 0.0291                | 0.0322                | 183                          | 0.542    | 0.588                 | 0.607                 | 33.5                        | -3.26    | $1.13 \times 10^{-3}$ | $5.16 \times 10^{-3}$ |          |

**Supplementary Table 2: Comparisons of c-Fos positive cell densities normalized on cage controls.** False discovery rate (FDR) corrected p values, *q*, inferior to 0.05 are highlighted in red.

Abbreviations: cortex: primary auditory (Au1), prelimbic (PrL), infralimbic (IL), cingulate 1 and 2 (Cg1, Cg2), dysgranular and granular retrosplenial (RSD, RSG), parietal and posterior parietal (Par, PostPar), medial entorhinal (MEC); striatum and dopaminergic nuclei (DA nuc): dorsomedial striatum (DMS), dorsolateral striatum (DLS), nucleus accumbens core (AcbC) and shell (AcbS), ventral tegmental area (VTA), substantia nigra pars compacta (SNc); hippocampus: dorsal CA1 (dCA1), dorsal CA3 (dCA3), ventral CA1 (vCA1), ventral CA3 (vCA3), dorsal CA2 (dCA2), dorsal and ventral dentate gyrus (dDG, vDG); cerebellum: lobules IV/V (Lob IV/V), VI (Lob VI), VII (Lob VII), IX (Lob IX), X (Lob X), dentate (Dent N), fastigial (Fast N) and interpositus nuclei (IntP N).

| Region   | Kruskal-Wallis on exploration, exploitation, swimming controls and cage control |                         |                         | Mann-Whitney U-tests                         |       |                          |                         |                                               |       |                         |                         |                                                               |       |                         |                         |
|----------|---------------------------------------------------------------------------------|-------------------------|-------------------------|----------------------------------------------|-------|--------------------------|-------------------------|-----------------------------------------------|-------|-------------------------|-------------------------|---------------------------------------------------------------|-------|-------------------------|-------------------------|
|          | H                                                                               | p                       | q                       | Exploration swimming control vs Cage Control |       |                          |                         | Exploitation swimming control vs Cage Control |       |                         |                         | Exploration swimming control vs Exploitation swimming control |       |                         |                         |
|          |                                                                                 |                         |                         | U                                            | z     | p                        | q                       | U                                             | z     | p                       | q                       | U                                                             | z     | p                       | q                       |
| Au1      | H <sub>4,82</sub> = 50.9                                                        | 2.2 x 10 <sup>-10</sup> | 6.3 x 10 <sup>-10</sup> | 358                                          | 5.12  | 2.97 x 10 <sup>-7</sup>  | 1.19 x 10 <sup>-6</sup> | 308.5                                         | 4.24  | 2.26 x 10 <sup>-5</sup> | 9.03 x 10 <sup>-5</sup> | 164.5                                                         | 2.57  | 0.01                    | 0.01                    |
| PrL      | H <sub>4,82</sub> = 63.8                                                        | 4.6 x 10 <sup>-13</sup> | 5.2 x 10 <sup>-12</sup> | 360                                          | 5.18  | 2.19 x 10 <sup>-7</sup>  | 2.34 x 10 <sup>-6</sup> | 333                                           | 4.98  | 6.42 x 10 <sup>-7</sup> | 6.85 x 10 <sup>-6</sup> | 189                                                           | 3.64  | 2.68 x 10 <sup>-4</sup> | 1.22 x 10 <sup>-3</sup> |
| IL       | H <sub>4,82</sub> = 64.1                                                        | 3.9 x 10 <sup>-13</sup> | 6.7 x 10 <sup>-12</sup> | 360                                          | 5.18  | 2.19 x 10 <sup>-7</sup>  | 1.76 x 10 <sup>-6</sup> | 330                                           | 4.88  | 1.02 x 10 <sup>-6</sup> | 6.54 x 10 <sup>-6</sup> | 193                                                           | 3.82  | 1.33 x 10 <sup>-4</sup> | 8.56 x 10 <sup>-4</sup> |
| Cg1      | H <sub>4,82</sub> = 58.1                                                        | 7.1 x 10 <sup>-12</sup> | 4.0 x 10 <sup>-11</sup> | 360                                          | 5.18  | 2.19 x 10 <sup>-7</sup>  | 7.01 x 10 <sup>-6</sup> | 335                                           | 5.04  | 4.68 x 10 <sup>-7</sup> | 7.48 x 10 <sup>-6</sup> | 178                                                           | 3.16  | 1.55 x 10 <sup>-3</sup> | 3.32 x 10 <sup>-3</sup> |
| Cg2      | H <sub>4,82</sub> = 59.5                                                        | 3.6 x 10 <sup>-12</sup> | 3.1 x 10 <sup>-11</sup> | 360                                          | 5.18  | 2.19 x 10 <sup>-7</sup>  | 3.51 x 10 <sup>-6</sup> | 336                                           | 5.07  | 3.99 x 10 <sup>-7</sup> | 1.27 x 10 <sup>-5</sup> | 179                                                           | 3.21  | 1.34 x 10 <sup>-3</sup> | 3.29 x 10 <sup>-3</sup> |
| RSD      | H <sub>4,82</sub> = 37.1                                                        | 1.7 x 10 <sup>-7</sup>  | 2.4 x 10 <sup>-7</sup>  | 309.5                                        | 3.72  | 1.96 x 10 <sup>-4</sup>  | 2.51 x 10 <sup>-4</sup> | 293.5                                         | 3.78  | 1.55 x 10 <sup>-4</sup> | 4.95 x 10 <sup>-4</sup> | 135                                                           | 1.29  | 0.20                    | 0.22                    |
| RSG      | H <sub>4,82</sub> = 38.4                                                        | 9.1 x 10 <sup>-8</sup>  | 1.5 x 10 <sup>-7</sup>  | 311                                          | 3.77  | 1.65 x 10 <sup>-4</sup>  | 2.19 x 10 <sup>-4</sup> | 262                                           | 2.83  | 4.66 x 10 <sup>-3</sup> | 7.1 x 10 <sup>-3</sup>  | 146.5                                                         | 1.79  | 0.073                   | 0.09                    |
| Par      | H <sub>4,82</sub> = 58.7                                                        | 5.4 x 10 <sup>-12</sup> | 3.7 x 10 <sup>-11</sup> | 357                                          | 5.09  | 3.48 x 10 <sup>-7</sup>  | 1.24 x 10 <sup>-6</sup> | 325.5                                         | 4.75  | 2.02 x 10 <sup>-6</sup> | 9.23 x 10 <sup>-6</sup> | 180                                                           | 3.25  | 1.15 x 10 <sup>-3</sup> | 3.34 x 10 <sup>-3</sup> |
| PostPar  | H <sub>4,81</sub> = 57.8                                                        | 8.4 x 10 <sup>-12</sup> | 4.1 x 10 <sup>-11</sup> | 331                                          | 4.92  | 8.71 x 10 <sup>-7</sup>  | 2.32 x 10 <sup>-6</sup> | 329                                           | 4.86  | 1.18 x 10 <sup>-6</sup> | 6.31 x 10 <sup>-6</sup> | 169                                                           | 3.24  | 1.2 x 10 <sup>-3</sup>  | 3.19 x 10 <sup>-3</sup> |
| MEC      | H <sub>4,78</sub> = 49.2                                                        | 5.4 x 10 <sup>-10</sup> | 1.4 x 10 <sup>-9</sup>  | 324                                          | 4.90  | 9.40 x 10 <sup>-7</sup>  | 2.31 x 10 <sup>-6</sup> | 283                                           | 4.17  | 3.04 x 10 <sup>-5</sup> | 1.08 x 10 <sup>-4</sup> | 177                                                           | 3.12  | 1.80 x 10 <sup>-3</sup> | 3.62 x 10 <sup>-3</sup> |
| DMS      | H <sub>4,82</sub> = 66.8                                                        | 1.1 x 10 <sup>-13</sup> | 3.6 x 10 <sup>-12</sup> | 359                                          | 5.15  | 2.56 x 10 <sup>-7</sup>  | 1.36 x 10 <sup>-6</sup> | 267                                           | 2.98  | 2.87 x 10 <sup>-3</sup> | 4.59 x 10 <sup>-3</sup> | 210                                                           | 4.56  | 5.08 x 10 <sup>-6</sup> | 1.63 x 10 <sup>-4</sup> |
| DLS      | H <sub>4,82</sub> = 28.8                                                        | 2.1 x 10 <sup>-5</sup>  | 2.8 x 10 <sup>-5</sup>  | 290                                          | 3.16  | 1.55 x 10 <sup>-3</sup>  | 1.91 x 10 <sup>-3</sup> | 135.5                                         | -0.97 | 0.33                    | 0.35                    | 168.5                                                         | 2.75  | 5.94 x 10 <sup>-3</sup> | 9.49 x 10 <sup>-3</sup> |
| AcbC     | H <sub>4,82</sub> = 38.1                                                        | 1.1 x 10 <sup>-7</sup>  | 1.6 x 10 <sup>-7</sup>  | 326                                          | 4.20  | 2.66 x 10 <sup>-5</sup>  | 4.26 x 10 <sup>-5</sup> | 245.5                                         | 2.33  | 0.02                    | 0.027                   | 169.5                                                         | 2.79  | 5.21 x 10 <sup>-3</sup> | 8.78 x 10 <sup>-3</sup> |
| AcbS     | H <sub>4,82</sub> = 56.4                                                        | 1.6 x 10 <sup>-11</sup> | 6.2 x 10 <sup>-11</sup> | 355                                          | 5.04  | 4.71 x 10 <sup>-7</sup>  | 1.51 x 10 <sup>-6</sup> | 240.5                                         | 2.18  | 0.029                   | 0.037                   | 200                                                           | 4.12  | 3.72 x 10 <sup>-5</sup> | 3.97 x 10 <sup>-4</sup> |
| VTA      | H <sub>4,82</sub> = 45.4                                                        | 3.3 x 10 <sup>-9</sup>  | 8.1 x 10 <sup>-9</sup>  | 349.5                                        | 4.88  | 1.06 x 10 <sup>-5</sup>  | 2.43 x 10 <sup>-5</sup> | 277.5                                         | 3.30  | 9.69 x 10 <sup>-4</sup> | 2.07 x 10 <sup>-3</sup> | 181.5                                                         | 3.32  | 9.09 x 10 <sup>-4</sup> | 3.23 x 10 <sup>-3</sup> |
| SNC      | H <sub>4,82</sub> = 2.4                                                         | 0.66                    | 0.66                    |                                              |       |                          |                         |                                               |       |                         |                         |                                                               |       |                         |                         |
| dCA1     | H <sub>4,82</sub> = 39.8                                                        | 4.8 x 10 <sup>-8</sup>  | 9.7 x 10 <sup>-8</sup>  | 320                                          | 4.03  | 5.63 x 10 <sup>-5</sup>  | 8.58 x 10 <sup>-5</sup> | 270                                           | 3.07  | 2.12 x 10 <sup>-3</sup> | 3.58 x 10 <sup>-3</sup> | 154.5                                                         | 2.14  | 0.03                    | 0.041                   |
| dCA3     | H <sub>4,82</sub> = 39.9                                                        | 4.5 x 10 <sup>-8</sup>  | 9.6 x 10 <sup>-8</sup>  | 320                                          | 4.03  | 5.64 x 10 <sup>-5</sup>  | 8.20 x 10 <sup>-5</sup> | 283                                           | 3.46  | 5.3 x 10 <sup>-4</sup>  | 1.3 x 10 <sup>-3</sup>  | 144.5                                                         | 1.70  | 0.089                   | 0.101                   |
| vCA1     | H <sub>4,82</sub> = 57.6                                                        | 9.3 x 10 <sup>-12</sup> | 3.9 x 10 <sup>-11</sup> | 359                                          | 5.15  | 2.56 x 10 <sup>-7</sup>  | 1.17 x 10 <sup>-6</sup> | 331                                           | 4.92  | 8.75 x 10 <sup>-7</sup> | 7.00 x 10 <sup>-6</sup> | 172                                                           | 2.90  | 0.0037                  | 6.58 x 10 <sup>-3</sup> |
| vCA3     | H <sub>4,82</sub> = 38.2                                                        | 1.0 x 10 <sup>-7</sup>  | 1.5 x 10 <sup>-7</sup>  | 338                                          | 4.55  | 5.43 x 10 <sup>-6</sup>  | 9.66 x 10 <sup>-6</sup> | 281                                           | 3.41  | 6.62 x 10 <sup>-4</sup> | 1.51 x 10 <sup>-3</sup> | 121                                                           | 0.68  | 0.49                    | 0.49                    |
| dCA2     | H <sub>4,82</sub> = 11.7                                                        | 0.019                   | 0.020                   | 280                                          | 2.87  | 4.03 x 10 <sup>-3</sup>  | 4.78 x 10 <sup>-3</sup> | 192                                           | 0.71  | 0.48                    | 0.49                    | 158                                                           | 2.29  | 0.022                   | 0.029                   |
| dDG      | H <sub>4,82</sub> = 15.9                                                        | 0.0032                  | 0.0037                  | 131.5                                        | -1.39 | 0.17                     | 0.17                    | 47.5                                          | -3.63 | 2.79 x 10 <sup>-4</sup> | 8.14 x 10 <sup>-4</sup> | 159                                                           | 2.33  | 0.019                   | 0.027                   |
| vDG      | H <sub>4,82</sub> = 25.1                                                        | 4.7 x 10 <sup>-5</sup>  | 5.9 x 10 <sup>-5</sup>  | 190                                          | 0.27  | 0.78                     | 0.78                    | 62.5                                          | -3.18 | 1.48 x 10 <sup>-3</sup> | 2.79 x 10 <sup>-3</sup> | 185.5                                                         | 3.49  | 4.79 x 10 <sup>-4</sup> | 1.91 x 10 <sup>-3</sup> |
| Lob IV/V | H <sub>4,82</sub> = 55.9                                                        | 2.1 x 10 <sup>-11</sup> | 6.5 x 10 <sup>-11</sup> | 359                                          | 5.15  | 2.55 x 10 <sup>-7</sup>  | 1.63 x 10 <sup>-6</sup> | 248.5                                         | 2.42  | 0.015                   | 0.022                   | 207                                                           | 4.43  | 9.43 x 10 <sup>-6</sup> | 1.51 x 10 <sup>-4</sup> |
| Lob VI   | H <sub>4,78</sub> = 56.1                                                        | 1.8 x 10 <sup>-11</sup> | 6.6 x 10 <sup>-11</sup> | 300                                          | 4.98  | 6.23 x 10 <sup>-7</sup>  | 1.82 x 10 <sup>-6</sup> | 231                                           | 3.17  | 1.54 x 10 <sup>-3</sup> | 2.73 x 10 <sup>-3</sup> | 199                                                           | 4.08  | 4.49 x 10 <sup>-5</sup> | 3.59 x 10 <sup>-4</sup> |
| Simplex  | H <sub>4,82</sub> = 38.6                                                        | 8.4 x 10 <sup>-8</sup>  | 1.5 x 10 <sup>-7</sup>  | 338.5                                        | 4.56  | 5.073 x 10 <sup>-6</sup> | 9.55 x 10 <sup>-6</sup> | 245                                           | 2.31  | 0.02                    | 0.027                   | 174                                                           | 2.99  | 2.79 x 10 <sup>-3</sup> | 5.26 x 10 <sup>-3</sup> |
| Crus I   | H <sub>4,82</sub> = 39.2                                                        | 6.2 x 10 <sup>-8</sup>  | 1.2 x 10 <sup>-7</sup>  | 337                                          | 4.52  | 6.24 x 10 <sup>-6</sup>  | 1.05 x 10 <sup>-5</sup> | 237.5                                         | 2.09  | 0.037                   | 0.043                   | 192                                                           | 3.77  | 1.59 x 10 <sup>-4</sup> | 8.53 x 10 <sup>-4</sup> |
| Lob VII  | H <sub>4,55</sub> = 33.7                                                        | 8.6 x 10 <sup>-7</sup>  | 1.2 x 10 <sup>-6</sup>  | 141                                          | 3.96  | 7.6 x 10 <sup>-5</sup>   | 1.06 x 10 <sup>-4</sup> | 101.5                                         | 2.16  | 0.031                   | 0.038                   | 120                                                           | 3.29  | 9.92 x 10 <sup>-4</sup> | 3.17 x 10 <sup>-3</sup> |
| Crus II  | H <sub>4,81</sub> = 13.5                                                        | 9.1 x 10 <sup>-3</sup>  | 0.010                   | 244.5                                        | 2.14  | 0.033                    | 0.037                   | 171                                           | 0.29  | 0.77                    | 0.77                    | 145                                                           | 1.72  | 0.085                   | 0.10                    |
| Lob IX   | H <sub>4,76</sub> = 38.3                                                        | 9.5 x 10 <sup>-8</sup>  | 1.5 x 10 <sup>-7</sup>  | 288.5                                        | 4.6   | 4.22 x 10 <sup>-6</sup>  | 8.42 x 10 <sup>-6</sup> | 240.5                                         | 3.5   | 4.65 x 10 <sup>-4</sup> | 1.24 x 10 <sup>-3</sup> | 165                                                           | 2.60  | 9.38 x 10 <sup>-3</sup> | 0.014                   |
| Lob X    | H <sub>4,81</sub> = 40.6                                                        | 3.2 x 10 <sup>-8</sup>  | 7.2 x 10 <sup>-8</sup>  | 334                                          | 4.80  | 1.52 x 10 <sup>-5</sup>  | 3.25 x 10 <sup>-5</sup> | 264.5                                         | 3.23  | 1.25 x 10 <sup>-3</sup> | 2.51 x 10 <sup>-3</sup> | 178.5                                                         | 3.19  | 1.44 x 10 <sup>-3</sup> | 3.29 x 10 <sup>-3</sup> |
| Dent N   | H <sub>4,80</sub> = 3.9                                                         | 0.42                    | 0.42                    |                                              |       |                          |                         |                                               |       |                         |                         |                                                               |       |                         |                         |
| Fast N   | H <sub>4,80</sub> = 15.9                                                        | 3.1 x 10 <sup>-3</sup>  | 3.8 x 10 <sup>-3</sup>  | 96                                           | -2.12 | 0.034                    | 0.037                   | 116.5                                         | -1.2  | 0.23                    | 0.25                    | 88                                                            | -0.72 | 0.47                    | 0.49                    |
| IntP N   | H <sub>4,80</sub> = 15.5                                                        | 3.7 x 10 <sup>-3</sup>  | 4.2 x 10 <sup>-3</sup>  | 103.5                                        | -1.89 | 0.059                    | 0.063                   | 102                                           | -1.67 | 0.094                   | 0.108                   | 132.5                                                         | 1.18  | 0.24                    | 0.25                    |

**Supplementary Table 3: Comparisons of c-Fos positive cell densities of swimming controls normalized on cage controls.** False discovery rate (FDR) corrected p values, q, inferior to 0.05 are highlighted in red.

Abbreviations: cortex: primary auditory (Au1), prelimbic (PrL), infralimbic (IL), cingulate 1 and 2 (Cg1, Cg2), dysgranular and granular retrosplenial (RSD, RSG), parietal and posterior parietal (Par, PostPar), medial entorhinal (MEC); striatum and dopaminergic nuclei (DA nuc): dorsomedial striatum (DMS), dorsolateral striatum (DLS), nucleus accumbens core (AcbC) and shell (AcbS), ventral tegmental area (VTA), substantia nigra pars compacta (SNc); hippocampus: dorsal CA1 (dCA1), dorsal CA3 (dCA3), ventral CA1 (vCA1), ventral CA3 (vCA3), dorsal CA2 (dCA2), dorsal and ventral dentate gyrus (dDG, vDG); cerebellum: lobules IV/V (Lob IV/V), VI (Lob VI), VII (Lob VII), IX (Lob IX), X (Lob X), dentate (Dent N), fastigial (Fast N) and interpositus nuclei (IntP N).



| Region   | Sign test               |        |      |                        |       |      |
|----------|-------------------------|--------|------|------------------------|-------|------|
|          | Exploration mice        |        |      | Exploitation mice      |       |      |
|          | Z                       | p      | q    | Z                      | p     | q    |
| Au1      | Z <sub>15</sub> = -2.58 | 0.0098 | 0.28 | Z <sub>15</sub> = 0.52 | 0.61  | 0.88 |
| PrL      | Z <sub>15</sub> = -0.80 | 0.42   | 0.94 | Z <sub>15</sub> = 1.55 | 0.12  | 0.43 |
| IL       | Z <sub>15</sub> = -1.03 | 0.30   | 1.09 | Z <sub>15</sub> = 1.55 | 0.12  | 0.43 |
| Cg1      | Z <sub>15</sub> = 0.00  | 1.00   | 1.32 | Z <sub>15</sub> = 0.52 | 0.61  | 0.88 |
| Cg2      | Z <sub>15</sub> = 0.52  | 0.61   | 1.11 | Z <sub>15</sub> = 2.07 | 0.039 | 0.38 |
| RSD      | Z <sub>15</sub> = -1.03 | 0.30   | 0.97 | Z <sub>15</sub> = 0.52 | 0.61  | 0.88 |
| RSG      | Z <sub>15</sub> = 0.00  | 1.00   | 1.26 | Z <sub>15</sub> = 0.52 | 0.61  | 0.88 |
| Par      | Z <sub>15</sub> = 0.52  | 0.61   | 1.03 | Z <sub>15</sub> = 0.00 | 1.00  | 1.00 |
| PostPar  | Z <sub>15</sub> = -0.52 | 0.61   | 0.98 | Z <sub>14</sub> = 0.80 | 0.42  | 0.88 |
| MEC      | Z <sub>14</sub> = -0.80 | 0.42   | 0.88 | Z <sub>12</sub> = 1.44 | 0.15  | 0.43 |
| DMS      | Z <sub>15</sub> = 0.80  | 0.42   | 0.82 | Z <sub>15</sub> = 2.07 | 0.039 | 0.38 |
| DLS      | Z <sub>15</sub> = 0.00  | 1.00   | 1.21 | Z <sub>15</sub> = 0.00 | 1.00  | 1.00 |
| AcbC     | Z <sub>15</sub> = -1.55 | 0.12   | 1.76 | Z <sub>15</sub> = 2.07 | 0.04  | 0.38 |
| AcbS     | Z <sub>15</sub> = 1.55  | 0.12   | 1.17 | Z <sub>15</sub> = 0.00 | 1.00  | 1.00 |
| VTA      | Z <sub>15</sub> = 1.55  | 0.12   | 0.88 | Z <sub>15</sub> = 0.52 | 0.61  | 0.88 |
| SNc      | Z <sub>14</sub> = 1.34  | 0.18   | 0.88 | Z <sub>13</sub> = 0.00 | 1.00  | 1.00 |
| dCA1     | Z <sub>15</sub> = 0.52  | 0.61   | 0.92 | Z <sub>15</sub> = 0.00 | 1.00  | 1.00 |
| dCA3     | Z <sub>15</sub> = 0.27  | 0.79   | 1.09 | Z <sub>15</sub> = 1.03 | 0.30  | 0.67 |
| vCA1     | Z <sub>15</sub> = 0.00  | 1.00   | 1.16 | Z <sub>14</sub> = 0.27 | 0.79  | 0.99 |
| vCA3     | Z <sub>15</sub> = 1.55  | 0.12   | 0.70 | Z <sub>15</sub> = 1.03 | 0.30  | 0.67 |
| dCA2     | Z <sub>13</sub> = 0.00  | 1.00   | 1.11 | Z <sub>15</sub> = 1.03 | 0.30  | 0.67 |
| dDG      | Z <sub>15</sub> = 0.00  | 1.00   | 1.07 | Z <sub>15</sub> = 0.52 | 0.61  | 0.88 |
| vDG      | Z <sub>15</sub> = -1.34 | 0.18   | 0.75 | Z <sub>15</sub> = 1.55 | 0.12  | 0.43 |
| Lob IV/V | N/A                     | N/A    | N/A  | N/A                    | N/A   | N/A  |
| Lob VI   | N/A                     | N/A    | N/A  | N/A                    | N/A   | N/A  |
| Simplex  | Z <sub>15</sub> = -1.04 | 0.30   | 0.87 | Z <sub>15</sub> = 1.55 | 0.12  | 0.43 |
| Crus I   | Z <sub>15</sub> = -1.04 | 0.31   | 0.79 | Z <sub>15</sub> = 0.00 | 1.00  | 1.00 |
| Lob VII  | N/A                     | N/A    | N/A  | N/A                    | N/A   | N/A  |
| Crus II  | Z <sub>15</sub> = 0.52  | 0.61   | 0.88 | Z <sub>12</sub> = 1.44 | 0.16  | 0.43 |
| Lob IX   | N/A                     | N/A    | N/A  | N/A                    | N/A   | N/A  |
| Lob X    | N/A                     | N/A    | N/A  | N/A                    | N/A   | N/A  |
| Dent N   | Z <sub>9</sub> = 0.00   | 1.00   | 1.04 | Z <sub>12</sub> = 1.44 | 0.15  | 0.99 |
| Fast N   | Z <sub>9</sub> = -1.03  | 0.32   | 0.73 | Z <sub>12</sub> = 0.29 | 0.77  | 0.43 |
| IntP N   | Z <sub>9</sub> = 0      | 1.00   | 1.00 | Z <sub>12</sub> = 0.29 | 0.77  | 0.99 |

**Supplementary Table 4: c-Fos positive cell densities left-right comparisons.** No differences were detected between left and right hemispheres in exploration and exploitation mice. *q* values show *p* values corrected for False Discovery Rate (FDR). For lobules IV/V, VI, VII, IX, X, which are located in the vermal part of the cerebellum, there was no separate counting for left and right.

Abbreviations: cortex: primary auditory (Au1), prelimbic (PrL), infralimbic (IL), cingulate 1 and 2 (Cg1, Cg2), dysgranular and granular retrosplenial (RSD, RSG), parietal and posterior parietal (Par, PostPar), medial entorhinal (MEC); striatum and dopaminergic nuclei (DA nuc): dorsomedial striatum (DMS), dorsolateral striatum (DLS), nucleus accumbens core (AcbC) and shell (AcbS), ventral tegmental area (VTA), substantia nigra pars compacta (SNc); hippocampus: dorsal CA1 (dCA1), dorsal CA3 (dCA3), ventral CA1 (vCA1), ventral CA3 (vCA3), dorsal CA2 (dCA2), dorsal and ventral dentate gyrus (dDG, vDG); cerebellum: lobules IV/V (Lob IV/V), VI (Lob VI), VII (Lob VII), IX (Lob IX), X (Lob X), dentate (Dent N), fastigial (Fast N) and interpositus nuclei (IntP N).

**a**

| Mouse | Path Integration         |                                 |                                                |                      | Model-based Reinforcement Learning |                              |                                                |                      | Model-free Reinforcement Learning<br>(without memory of past actions) |                              |                                                |                      |
|-------|--------------------------|---------------------------------|------------------------------------------------|----------------------|------------------------------------|------------------------------|------------------------------------------------|----------------------|-----------------------------------------------------------------------|------------------------------|------------------------------------------------|----------------------|
|       | Learning rate ( $\eta$ ) | Error accumulation ( $\sigma$ ) | Exploration/exploitation trade-off ( $\beta$ ) | Max (log likelihood) | Learning rate ( $\eta$ )           | Discount factor ( $\gamma$ ) | Exploration/exploitation trade-off ( $\beta$ ) | Max (log likelihood) | Learning rate ( $\eta$ )                                              | Discount factor ( $\gamma$ ) | Exploration/exploitation trade-off ( $\beta$ ) | Max (log likelihood) |
| 1     | 0.001                    | 0.0008                          | 1.14                                           | <b>-376.09</b>       | 0.47                               | 0.93                         | 4.43                                           | <b>-353.48</b>       | 0.87                                                                  | 1.00                         | 0.76                                           | <b>-345.85</b>       |
| 2     | 0.001                    | 1.0000                          | 6.47                                           | <b>-490.20</b>       | 0.13                               | 1.00                         | 6.58                                           | <b>-472.41</b>       | 0.85                                                                  | 1.00                         | 1.05                                           | <b>-421.82</b>       |
| 3     | 0.002                    | 0.0003                          | 0.98                                           | <b>-408.16</b>       | 0.39                               | 0.78                         | 6.93                                           | <b>-379.45</b>       | 0.16                                                                  | 1.00                         | 5.92                                           | <b>-340.73</b>       |
| 4     | 0.001                    | 0.0015                          | 1.28                                           | <b>-348.19</b>       | 0.89                               | 0.87                         | 4.83                                           | <b>-328.25</b>       | 0.20                                                                  | 1.00                         | 6.05                                           | <b>-302.24</b>       |
| 5     | 0.001                    | 0.0003                          | 0.83                                           | <b>-444.17</b>       | 0.80                               | 0.97                         | 3.03                                           | <b>-423.04</b>       | 0.17                                                                  | 0.84                         | 4.92                                           | <b>-379.34</b>       |
| 6     | 0.996                    | 0.0009                          | 0.70                                           | <b>-538.02</b>       | 0.76                               | 0.29                         | 200.00                                         | <b>-503.53</b>       | 0.08                                                                  | 1.00                         | 9.41                                           | <b>-482.90</b>       |
| 7     | 0.001                    | 1.0000                          | 7.83                                           | <b>-514.61</b>       | 0.89                               | 0.88                         | 4.39                                           | <b>-491.09</b>       | 0.15                                                                  | 1.00                         | 3.68                                           | <b>-484.85</b>       |
| 8     | 0.982                    | 0.0031                          | 1.29                                           | <b>-611.51</b>       | 0.89                               | 0.90                         | 4.25                                           | <b>-576.73</b>       | 0.36                                                                  | 1.00                         | 1.50                                           | <b>-552.72</b>       |
| 9     | 1.000                    | 0.0019                          | 1.29                                           | <b>-518.58</b>       | 0.76                               | 0.96                         | 3.53                                           | <b>-466.68</b>       | 0.31                                                                  | 1.00                         | 2.86                                           | <b>-417.21</b>       |
| 10    | 0.001                    | 0.0003                          | 0.89                                           | <b>-563.74</b>       | 0.75                               | 0.28                         | 200.00                                         | <b>-519.95</b>       | 0.08                                                                  | 1.00                         | 6.55                                           | <b>-502.52</b>       |
| 11    | 0.628                    | 0.0013                          | 0.93                                           | <b>-646.86</b>       | 0.88                               | 0.56                         | 11.69                                          | <b>-639.53</b>       | 0.19                                                                  | 1.00                         | 2.56                                           | <b>-589.24</b>       |
| 12    | 0.001                    | 0.9568                          | 5.38                                           | <b>-812.72</b>       | 0.80                               | 0.94                         | 3.50                                           | <b>-750.07</b>       | 0.12                                                                  | 1.00                         | 3.24                                           | <b>-743.17</b>       |
| 13    | 0.936                    | 0.0024                          | 1.47                                           | <b>-599.09</b>       | 0.97                               | 0.68                         | 8.93                                           | <b>-579.27</b>       | 0.19                                                                  | 1.00                         | 2.13                                           | <b>-576.56</b>       |
| 14    | 0.001                    | 0.0017                          | 0.93                                           | <b>-495.97</b>       | 0.32                               | 0.85                         | 4.96                                           | <b>-469.88</b>       | 0.11                                                                  | 1.00                         | 4.89                                           | <b>-473.38</b>       |
| 15    | 0.576                    | 0.0041                          | 1.34                                           | <b>-756.02</b>       | 0.71                               | 0.99                         | 3.01                                           | <b>-691.71</b>       | 1.00                                                                  | 1.00                         | 0.20                                           | <b>-745.84</b>       |

**b**

| Mouse | Model-free Reinforcement Learning<br>(without memory of past actions) |                              |                                                |                      |
|-------|-----------------------------------------------------------------------|------------------------------|------------------------------------------------|----------------------|
|       | Learning rate ( $\eta$ )                                              | Discount factor ( $\gamma$ ) | Exploration/exploitation trade-off ( $\beta$ ) | Max (log likelihood) |
| 1     | 0.45                                                                  | 1.00                         | 0.34                                           | <b>-332.66</b>       |
| 2     | 0.02                                                                  | 1.00                         | 18.40                                          | <b>-344.68</b>       |
| 3     | 0.07                                                                  | 1.00                         | 2.04                                           | <b>-355.87</b>       |
| 4     | 0.05                                                                  | 1.00                         | 4.07                                           | <b>-318.48</b>       |
| 5     | 0.03                                                                  | 1.00                         | 3.15                                           | <b>-426.17</b>       |
| 6     | 0.03                                                                  | 1.00                         | 1.80                                           | <b>-523.92</b>       |
| 7     | 0.64                                                                  | 1.00                         | 0.47                                           | <b>-395.15</b>       |
| 8     | 0.58                                                                  | 1.00                         | 0.28                                           | <b>-524.22</b>       |
| 9     | 0.68                                                                  | 1.00                         | 0.31                                           | <b>-407.27</b>       |
| 10    | 0.64                                                                  | 1.00                         | 0.07                                           | <b>-579.21</b>       |
| 11    | 0.83                                                                  | 1.00                         | 0.12                                           | <b>-604.87</b>       |
| 12    | 0.66                                                                  | 1.00                         | 0.23                                           | <b>-653.92</b>       |
| 13    | 0.97                                                                  | 1.00                         | 0.15                                           | <b>-534.31</b>       |
| 14    | 0.03                                                                  | 1.00                         | 4.15                                           | <b>-444.91</b>       |
| 15    | 0.90                                                                  | 1.00                         | 0.14                                           | <b>-671.09</b>       |

**Supplementary Table 5: Parameter optimization results for the three models capable of learning the sequence (a) and for the model-free algorithm without memory (b).** The parameters were optimized for each mouse and each model by identifying the set giving the maximum log likelihood. In red are highlighted the highest maximum log likelihood values across the four learning models and orange values highlight the highest values amongst the three model capable of learning the sequence (a). These optimized parameters were used for the learning simulations (Figure 3, Supplementary Figures 7) and the correlation analysis between the model-free reinforcement learning parameters and c-Fos densities (Figures 3, Supplementary Figure 8 and Supplementary Table 4).

**a**

|                                                | Spearman correlation     |       |                              |       |                                                |       |
|------------------------------------------------|--------------------------|-------|------------------------------|-------|------------------------------------------------|-------|
|                                                | Learning rate ( $\eta$ ) |       | Discount factor ( $\gamma$ ) |       | Exploration/exploitation trade-off ( $\beta$ ) |       |
|                                                | $\rho$                   | $p$   | $\rho$                       | $p$   | $\rho$                                         | $p$   |
| Learning rate ( $\eta$ )                       |                          |       | 0.077                        | 0.802 | -0.81                                          | 0.001 |
| Discount factor ( $\gamma$ )                   | 0.077                    | 0.802 |                              |       | -0.15                                          | 0.615 |
| Exploration/exploitation trade-off ( $\beta$ ) | -0.81                    | 0.001 | -0.15                        | 0.615 |                                                |       |

**b**

| Region   | Spearman correlation     |       |       |                              |       |       |                                                |        |       |
|----------|--------------------------|-------|-------|------------------------------|-------|-------|------------------------------------------------|--------|-------|
|          | Learning rate ( $\eta$ ) |       |       | Discount factor ( $\gamma$ ) |       |       | Exploration/exploitation trade-off ( $\beta$ ) |        |       |
|          | $\rho$                   | $p$   | $q$   | $\rho$                       | $p$   | $q$   | $\rho$                                         | $p$    | $q$   |
| Au1      | 0.45                     | 0.125 | 0.250 | -0.15                        | 0.615 | 0.804 | -0.04                                          | 0.91   | 0.967 |
| PrL      | 0.61                     | 0.030 | 0.117 | 0.15                         | 0.615 | 0.804 | -0.34                                          | 0.263  | 0.419 |
| IL       | 0.39                     | 0.189 | 0.292 | 0.00                         | 1     | 1.000 | -0.09                                          | 0.778  | 0.853 |
| Cg1      | 0.03                     | 0.921 | 0.921 | -0.23                        | 0.447 | 0.804 | 0.26                                           | 0.394  | 0.515 |
| Cg2      | 0.59                     | 0.036 | 0.122 | 0.15                         | 0.615 | 0.804 | -0.41                                          | 0.169  | 0.391 |
| RSD      | 0.48                     | 0.097 | 0.220 | -0.08                        | 0.802 | 0.880 | -0.42                                          | 0.157  | 0.391 |
| RSG      | 0.68                     | 0.014 | 0.079 | -0.15                        | 0.615 | 0.804 | -0.55                                          | 0.055  | 0.208 |
| Par      | 0.14                     | 0.643 | 0.754 | 0.15                         | 0.615 | 0.804 | 0.00                                           | 1      | 1.000 |
| PostPar  | -0.12                    | 0.71  | 0.779 | -0.31                        | 0.305 | 0.804 | 0.37                                           | 0.216  | 0.419 |
| MEC      | 0.08                     | 0.80  | 0.824 | 0.48                         | 0.114 | 0.804 | -0.41                                          | 0.184  | 0.391 |
| DMS      | 0.30                     | 0.315 | 0.412 | -0.15                        | 0.615 | 0.804 | -0.36                                          | 0.231  | 0.419 |
| DLS      | -0.15                    | 0.63  | 0.754 | 0.08                         | 0.802 | 0.880 | -0.23                                          | 0.448  | 0.564 |
| AcbC     | 0.54                     | 0.058 | 0.155 | 0.15                         | 0.615 | 0.804 | -0.69                                          | 0.012  | 0.074 |
| AcbS     | 0.34                     | 0.263 | 0.363 | 0.00                         | 1     | 1.000 | -0.28                                          | 0.353  | 0.480 |
| VTA      | 0.54                     | 0.06  | 0.155 | -0.31                        | 0.305 | 0.804 | -0.33                                          | 0.271  | 0.419 |
| SNC      | 0.53                     | 0.064 | 0.155 | 0.23                         | 0.447 | 0.804 | -0.68                                          | 0.013  | 0.074 |
| dCA1     | 0.70                     | 0.01  | 0.068 | -0.15                        | 0.615 | 0.804 | -0.55                                          | 0.052  | 0.208 |
| dCA3     | 0.62                     | 0.027 | 0.117 | 0.31                         | 0.305 | 0.804 | -0.78                                          | 0.003  | 0.026 |
| vCA1     | 0.42                     | 0.16  | 0.264 | -0.08                        | 0.802 | 0.880 | -0.44                                          | 0.135  | 0.391 |
| vCA3     | 0.73                     | 0.006 | 0.060 | 0.23                         | 0.447 | 0.804 | -0.77                                          | 0.003  | 0.026 |
| dCA2     | 0.55                     | 0.055 | 0.155 | -0.23                        | 0.447 | 0.804 | -0.65                                          | 0.018  | 0.087 |
| dDG      | 0.29                     | 0.343 | 0.432 | -0.15                        | 0.615 | 0.804 | -0.11                                          | 0.723  | 0.819 |
| vDG      | 0.09                     | 0.765 | 0.813 | -0.31                        | 0.305 | 0.804 | 0.28                                           | 0.353  | 0.480 |
| Lob IV/V | 0.73                     | 0.007 | 0.060 | -0.23                        | 0.447 | 0.804 | -0.46                                          | 0.115  | 0.391 |
| Lob VI   | 0.42                     | 0.152 | 0.264 | 0.08                         | 0.802 | 0.880 | -0.40                                          | 0.178  | 0.391 |
| Simplex  | 0.46                     | 0.115 | 0.244 | -0.23                        | 0.447 | 0.804 | -0.34                                          | 0.255  | 0.419 |
| Crus I   | 0.75                     | 0.004 | 0.060 | -0.23                        | 0.447 | 0.804 | -0.41                                          | 0.169  | 0.391 |
| Lob VII  | 0.50                     | 0.267 | 0.363 | 0.41                         | 0.363 | 0.804 | -0.54                                          | 0.236  | 0.419 |
| Crus II  | 0.36                     | 0.224 | 0.331 | -0.23                        | 0.447 | 0.804 | -0.31                                          | 0.297  | 0.439 |
| Lob IX   | 0.45                     | 0.163 | 0.264 | -0.20                        | 0.555 | 0.804 | -0.18                                          | 0.595  | 0.723 |
| Lob X    | 0.43                     | 0.140 | 0.264 | -0.39                        | 0.193 | 0.804 | -0.14                                          | 0.643  | 0.754 |
| Dent N   | 0.61                     | 0.031 | 0.117 | 0.08                         | 0.802 | 0.880 | -0.80                                          | 0.002  | 0.026 |
| Fast N   | 0.74                     | 0.005 | 0.060 | 0.00                         | 1     | 1.000 | -0.84                                          | 0.0006 | 0.020 |
| IntP N   | 0.12                     | 0.69  | 0.779 | -0.23                        | 0.447 | 0.804 | 0.00                                           | 1      | 1.000 |

**Supplementary Table 6: Spearman correlation analysis on the model-free reinforcement learning's parameters.** Only the 13 mice for which the model-free reinforcement learning with memory yielded a maximum log likelihood value were included (i.e. mice 14 and 15 were excluded). **(a)** Correlation between the parameters.  $p$  levels inferior or equal to 0.05 are highlighted in red. **(b)** Correlation between the learning parameters and c-Fos densities. False discovery rate (FDR) corrected  $p$  values,  $q$ , inferior to 0.05 are highlighted in red.  $q$  values inferior to 0.07 are highlighted in orange.

Abbreviations: cortex: primary auditory (Au1), prelimbic (PrL), infralimbic (IL), cingulate 1 and 2 (Cg1, Cg2), dysgranular and granular retrosplenial (RSD, RSG), parietal and posterior parietal (Par, PostPar), medial entorhinal (MEC); striatum and dopaminergic nuclei (DA nuc): dorsomedial striatum (DMS), dorsolateral striatum (DLS), nucleus accumbens core (AcbC) and shell (AcbS), ventral tegmental area (VTA), substantia nigra pars compacta (SNc); hippocampus: dorsal CA1 (dCA1), dorsal CA3 (dCA3), ventral CA1 (vCA1), ventral CA3 (vCA3), dorsal CA2 (dCA2), dorsal and ventral dentate gyrus (dDG, vDG); cerebellum: lobules IV/V (Lob IV/V), VI (Lob VI), VII (Lob VII), IX (Lob IX), X (Lob X), dentate (Dent N), fastigial (Fast N) and interpositus nuclei (IntP N).
